# Supplementary material
Source: PubMed Central journal article supplement (PMC2647742)

# Rh(I)-Catalyzed Direct Arylation of Pyridines and Quinolines

*Ashley M. Berman, Jared C. Lewis, Robert G. Bergman\*, and Jonathan A. Ellman\**

Department of Chemistry, University of California and Division of Chemical Sciences, Lawrence Berkeley National Laboratory, Berkeley, California, 94720.

jellman@berkeley.edu, rbergman@berkeley.edu

## Table of Contents

|                                                |      |
|------------------------------------------------|------|
| General Procedures                             | S-2  |
| Materials                                      | S-2  |
| Experimental Procedures                        | S-2  |
| Mechanistic Possibilities                      | S-11 |
| <sup>1</sup> H and <sup>13</sup> C NMR spectra | S-12 |

**General Procedures.** All reagents were degassed and handled under an inert nitrogen atmosphere using syringe and cannula techniques. Unless otherwise noted, all organic preparations were carried out in flame- or oven-dried glassware under a nitrogen atmosphere and all catalytic arylation reactions were assembled in a nitrogen-filled Vacuum Atmospheres inert atmosphere box. Flash column chromatography was carried out using a Biotage SP Flash Purification System (Biotage No. SP1-B1A) with Flash+ cartridges (Biotage No. FPK0-1107-16046, or FPL0-1118-15045) using hexanes/ethyl acetate gradients calculated using the TLC data recorded for each compound (vide infra). NMR spectroscopy ( $^1\text{H}$ ,  $^{13}\text{C}$ , and  $^{19}\text{F}$ ) was conducted using a Bruker AVQ-400 or AV-300 spectrometer at room temperature. Chemical shifts are reported in ppm relative to TMS as an internal standard ( $\text{Si}(\text{CH}_3)_4$ , 0.00 ppm) in  $\text{CDCl}_3$ , and coupling constants are reported in Hz. Mass spectrometry was performed by the University of California, Berkeley mass spectrometry facility using a VG ProSpec (EBE geometry) spectrometer equipped with an electron impact source (EI ionization). Reported tabular yields are the average of at least two experimental runs; yields reported in the following experimental procedures may vary slightly from those found in the tables.

**Materials.** Unless otherwise noted, all reagents were obtained from commercial suppliers and used without further purification.  $[\text{RhCl}(\text{CO})_2]_2$  was purchased from either Strem chemicals or Sigma-Aldrich and stored in the glove box. All liquid reagents were thoroughly degassed using three freeze-pump-thaw cycles prior to introduction to the glove box. 1, 4-Dioxane was obtained from a Seca Solvent System by GlassContour (solvent dried over alumina under a nitrogen atmosphere) prior to introduction to the glove box.

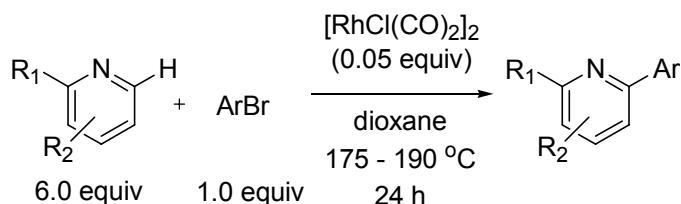

**General Procedure for the Catalytic Direct Arylation of Pyridines and Quinolines.** To a 15- or 25-mL sealable flame- or oven-dried Schlenk tube containing a stir bar was added  $[\text{RhCl}(\text{CO})_2]_2$  (0.0078 g, 0.0200 mmol), the heterocycle (2.400 mmol), the aryl bromide (0.400 mmol), and 1,4-dioxane (reaction diluted to a total concentration of 0.30 – 0.80 M). The volume of the heterocycle is not negligible at the concentrations used and must therefore be included in the concentration calculation. The reaction vessel was sealed, removed from the glove box, submerged to the neck in a silicone oil bath, heated at the indicated temperature with stirring for 24 h and then cooled to room temperature. The reaction mixture was transferred to a 60 mL separatory funnel using 3 x 5.0 mL of  $\text{CH}_2\text{Cl}_2$  and 2.5 mL of MeOH, the reaction mixture was washed with saturated  $\text{NaHCO}_3$  (1 x 20 mL), the aqueous layer was extracted with  $\text{CH}_2\text{Cl}_2$  (3 x 10 mL). The organic extracts were combined, washed with

saturated NaCl (1 x 20 mL), dried over Na<sub>2</sub>SO<sub>4</sub>, filtered through glass wool and concentrated to dryness under reduced pressure. The crude product mixture was loaded onto a Biotage samplet using a minimal amount of CH<sub>2</sub>Cl<sub>2</sub> (ca. 0.5 mL). This solvent was removed by placing the samplet under reduced pressure in a vacuum dessicator for ca. 15 min, and the samplet was loaded into a Biotage SP1 system. Eluting with an ethyl acetate/hexanes gradient calculated by the Biotage instrument from the R<sub>f</sub> of the product in a specified ethyl acetate/hexanes mixture provided the desired product.

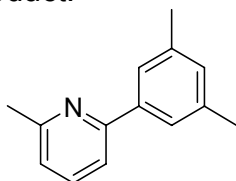

**2-(3,5-Dimethylphenyl)-6-methylpyridine (1a).** The reaction was conducted with 2-methylpyridine (0.2236 g, 2.400 mmol), 1-bromo-3,5-dimethylbenzene (0.0740 g, 0.400 mmol) and 0.25 mL of 1,4-dioxane at 190 °C for 24 h. The crude mixture was purified by flash chromatography using an ethyl acetate/hexanes gradient to provide 0.0422 g, 53% yield of **1a** as a clear, colorless oil. <sup>1</sup>H NMR (300.13 MHz, CDCl<sub>3</sub>): δ 7.63 – 7.57 (m, 3 H), 7.49 – 7.47 (m, 1 H), 7.08 – 7.03 (m, 2 H), 2.62 (s, 3 H), 2.39 (s, 6 H). <sup>13</sup>C {<sup>1</sup>H} NMR (100.61 MHz, CDCl<sub>3</sub>): δ 158.29, 157.44, 139.86, 138.24, 136.87, 130.50, 124.99, 121.54, 117.87, 24.90, 21.55. HRMS-EI (*m/z*): calculated for C<sub>14</sub>H<sub>15</sub>N: 197.1205; observed: 197.1200.

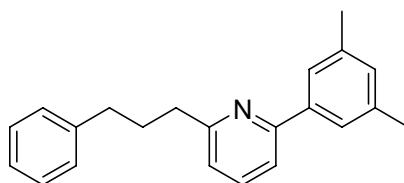

**2-(3,5-Dimethylphenyl)-6-(3-phenylpropyl)pyridine (1b).** The reaction was conducted with 2-(3-phenylpropyl)pyridine (0.4735 g, 2.400 mmol), 1-bromo-3,5-dimethylbenzene (0.0740 g, 0.400 mmol) and 0.10 mL of 1,4-dioxane at 190 °C for 24 h. The crude mixture was purified by flash chromatography using an ethyl acetate/hexanes gradient to provide 0.0609 g, 51% yield of **1b** as a clear, colorless oil. <sup>1</sup>H NMR (300.13 MHz, CDCl<sub>3</sub>): δ 7.65 – 7.60 (m, 3 H), 7.51 – 7.49 (m, 1 H), 7.32 – 7.16 (m, 5 H), 7.07 – 7.04 (m, 2 H), 2.93 – 2.88 (m, 2 H), 2.76 – 2.71 (m, 2 H), 2.39 (s, 6 H), 2.20 – 2.10 (m, 2 H). <sup>13</sup>C {<sup>1</sup>H} NMR (100.61 MHz, CDCl<sub>3</sub>): δ 161.83, 157.42, 142.52, 139.99, 138.28, 136.90, 130.54, 128.70, 128.45, 125.89, 125.05, 121.04, 118.15, 38.16, 35.75, 31.55, 21.63. HRMS-EI (*m/z*): calculated for C<sub>22</sub>H<sub>23</sub>N: 301.1831; observed: 301.1830.

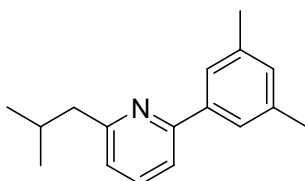

**2-(3,5-Dimethylphenyl)-6-isobutylpyridine (1c).** The reaction was conducted with 2-isobutylpyridine (0.3245 g, 2.400 mmol), 1-bromo-3,5-dimethylbenzene

(0.0740 g, 0.400 mmol) and 0.12 mL of 1,4-dioxane at 190 °C for 24 h. The crude mixture was purified by flash chromatography using an ethyl acetate/hexanes gradient to provide 0.0749 g, 78% yield of **1c** as a clear, colorless oil.  $^1\text{H}$  NMR (300.13 MHz,  $\text{CDCl}_3$ ):  $\delta$  7.63 – 7.57 (m, 3 H), 7.49 – 7.47 (m, 1 H), 7.03 – 7.00 (m, 2 H), 2.72 (d,  $J$  = 7.20 Hz, 2 H), 2.39 (s, 6 H), 2.26 – 2.17 (m, 1 H), 0.96 (d,  $J$  = 6.60 Hz, 6 H).  $^{13}\text{C}$   $\{^1\text{H}\}$  NMR (100.61 MHz,  $\text{CDCl}_3$ ):  $\delta$  161.28, 157.20, 139.92, 138.04, 136.41, 130.25, 124.85, 121.56, 117.85, 47.66, 28.99, 22.47, 21.41. HRMS-EI ( $m/z$ ): calculated for  $\text{C}_{17}\text{H}_{21}\text{N}$ : 239.1674; observed: 239.1666.

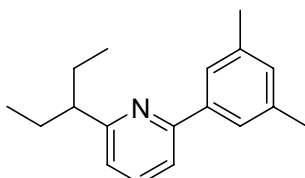

**2-(3,5-Dimethylphenyl)-6-(1-ethylpropyl)pyridine (1d).** The reaction was conducted with 2-(1-ethylpropyl)pyridine (0.3581 g, 2.400 mmol), 1-bromo-3,5-dimethylbenzene (0.0740 g, 0.400 mmol) and 0.10 mL of 1,4-dioxane at 190 °C for 24 h. The crude mixture was purified by flash chromatography using an ethyl acetate/hexanes gradient to provide 0.0707 g, 70% yield of **1d** as a clear, colorless oil.  $^1\text{H}$  NMR (300.13 MHz,  $\text{CDCl}_3$ ):  $\delta$  7.64 – 7.58 (m, 3 H), 7.50 – 7.47 (m, 1 H), 7.02 – 6.98 (m, 2 H), 2.66 – 2.57 (m, 1 H), 2.39 (s, 6 H), 1.85 – 1.68 (m, 4 H), 0.82 (t,  $J$  = 7.50 Hz, 6 H).  $^{13}\text{C}$   $\{^1\text{H}\}$  NMR (100.61 MHz,  $\text{CDCl}_3$ ):  $\delta$  164.84, 156.91, 140.08, 138.01, 136.26, 130.21, 124.84, 120.70, 117.77, 51.42, 28.10, 21.46, 12.13. HRMS-EI ( $m/z$ ): calculated for  $\text{C}_{18}\text{H}_{23}\text{N}$ : 253.1831; observed: 253.1834.

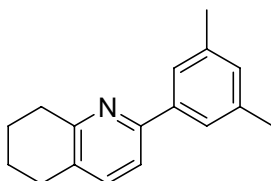

**6-(3,5-Dimethylphenyl)-2,3-(cyclohexeno)pyridine (1e).** The reaction was conducted with 2,3-cyclohexenopyridine (0.3197 g, 2.400 mmol), 1-bromo-3,5-dimethylbenzene (0.0740 g, 0.400 mmol) and 0.18 mL of 1,4-dioxane at 190 °C for 24 h. The crude mixture was purified by flash chromatography using an ethyl acetate/hexanes gradient to provide 0.0722 g, 76% yield of **1e** as a clear, colorless oil.  $^1\text{H}$  NMR (300.13 MHz,  $\text{CDCl}_3$ ):  $\delta$  7.53 (br s, 2 H), 7.43 – 7.36 (m, 2 H), 7.00 (br s, 1 H), 3.01 – 2.97 (m, 2 H), 2.81 – 2.77 (m, 2 H), 2.37 (s, 6 H), 1.92 – 1.82 (m, 4 H).  $^{13}\text{C}$   $\{^1\text{H}\}$  NMR (100.61 MHz,  $\text{CDCl}_3$ ):  $\delta$  157.16, 155.14, 139.99, 138.18, 137.46, 130.60, 130.17, 124.82, 118.20, 32.99, 28.67, 23.36, 22.93, 21.57. HRMS-EI ( $m/z$ ): calculated for  $\text{C}_{17}\text{H}_{19}\text{N}$ : 237.1518; observed: 237.1520.

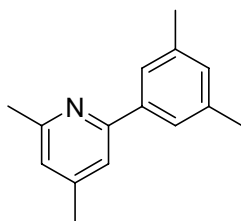

**2-(3,5-Dimethylphenyl)-4,6-(dimethyl)pyridine (1f).** The reaction was conducted with 2,4-dimethylpyridine (0.2573 g, 2.400 mmol), 1-bromo-3,5-dimethyl-benzene (0.0740 g, 0.400 mmol) and 0.25 mL of 1,4-dioxane at 190 °C for 24 h. The crude mixture was purified by flash chromatography using an ethyl acetate/hexanes gradient to provide 0.0570 g, 67% yield of **1f** as a white powder. mp 76 – 77 °C. <sup>1</sup>H NMR (300.13 MHz, CDCl<sub>3</sub>): δ 7.55 (s, 2 H), 7.31 (s, 1 H), 7.02 (s, 1 H), 6.91 (s, 1 H), 2.58 (s, 3 H), 2.38 (s, 6 H), 2.35 (s, 3 H). <sup>13</sup>C {<sup>1</sup>H} NMR (100.61 MHz, CDCl<sub>3</sub>): δ 158.09, 157.43, 147.75, 140.01, 138.21, 130.39, 125.04, 122.62, 119.01, 24.72, 21.58, 21.20. HRMS-EI (*m/z*): calculated for C<sub>15</sub>H<sub>17</sub>N: 211.1361; observed: 211.1356.

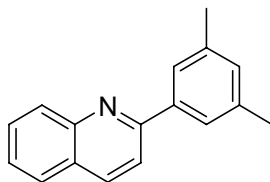

**2-(3,5-Dimethylphenyl)quinoline (1h).** The reaction was conducted with quinoline (0.3100 g, 2.400 mmol), 1-bromo-3,5-dimethyl-benzene (0.0740 g, 0.400 mmol) and 1.0 mL of 1,4-dioxane at 175 °C for 24 h. The crude mixture was purified by flash chromatography using an ethyl acetate/hexanes gradient to provide 0.0800 g, 86% yield of **1h** as a clear, colorless oil. <sup>1</sup>H NMR (400.13 MHz, CDCl<sub>3</sub>): δ 8.34 – 8.12 (m, 2 H), 7.91 – 7.67 (m, 5 H), 7.49 – 7.45 (m, 1 H), 7.08 (br s, 1 H), 2.41 (s, 6 H). <sup>13</sup>C {<sup>1</sup>H} NMR (100.61 MHz, CDCl<sub>3</sub>): δ 157.86, 148.38, 139.76, 138.48, 136.74, 131.17, 129.80, 129.70, 127.58, 127.28, 126.26, 125.57, 119.38, 21.62. HRMS-EI (*m/z*): calculated for C<sub>17</sub>H<sub>15</sub>N: 233.1205; observed: 233.1203.

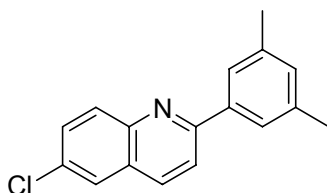

**2-(3,5-Dimethylphenyl)-6-chloroquinoline (1i).** The reaction was conducted with 6-chloro-quinoline (0.3919 g, 2.400 mmol), 1-bromo-3,5-dimethyl-benzene (0.0740 g, 0.400 mmol) and 1.0 mL of 1,4-dioxane at 175 °C for 24 h. The crude mixture was purified by flash chromatography using an ethyl acetate/hexanes gradient to provide 0.0695 g, 65% yield of **1i** as a pale yellow powder. mp 105 – 106 °C. <sup>1</sup>H NMR (300.13 MHz, CDCl<sub>3</sub>): δ 8.12 – 8.08 (m, 2 H), 7.89 – 7.86 (m, 1 H), 7.80 – 7.79 (m, 1 H), 7.75 (br s, 2 H), 7.66 – 7.63 (m, 1 H), 7.11 (br s, 1 H), 2.43 (s, 6 H). <sup>13</sup>C {<sup>1</sup>H} NMR (100.61 MHz, CDCl<sub>3</sub>): δ 158.04, 146.73, 139.27,

138.58, 135.79, 131.84, 131.43, 131.38, 130.59, 127.80, 126.25, 125.50, 120.14, 21.62. HRMS-EI ( $m/z$ ): calculated for  $C_{17}H_{14}N$ : 267.0815; observed: 267.0812.

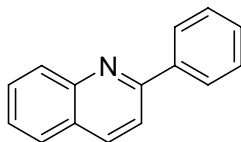

**2-Phenylquinoline (1j).** The reaction was conducted with quinoline (0.3100 g, 2.400 mmol), bromobenzene (0.0624 g, 0.400 mmol) and 1.0 mL of 1,4-dioxane at 175 °C for 24 h. The crude mixture was purified by flash chromatography using an ethyl acetate/hexanes gradient to provide 0.0608 g, 74% yield of **1j** as a white powder. mp 83 – 84 °C (lit. 84 – 85 °C).  $^1H$  NMR (300.13 MHz,  $CDCl_3$ ):  $\delta$  8.24 – 8.21 (m, 1 H), 8.19 – 8.15 (m, 3 H), 7.90 – 7.87 (m, 1 H), 7.84 – 7.82 (m, 1 H), 7.76 – 7.70 (m, 1 H), 7.56 – 7.44 (m, 4 H).  $^{13}C$   $\{^1H\}$  NMR (100.61 MHz,  $CDCl_3$ ):  $\delta$  157.49, 148.43, 139.83, 136.93, 129.89, 129.81, 129.48, 129.01, 127.73, 127.63, 127.32, 126.43, 119.15. HRMS-EI ( $m/z$ ): calculated for  $C_{15}H_{11}N$ : 205.0891; observed: 205.0894.

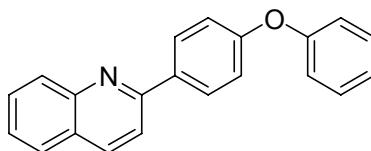

**2-(4-Phenoxyphenyl)quinoline (1k).** The reaction was conducted with quinoline (0.3100 g, 2.400 mmol), 1-bromo-4-phenoxy-benzene (0.0996 g, 0.400 mmol) and 1.0 mL of 1,4-dioxane at 175 °C for 24 h. The crude mixture was purified by flash chromatography using an ethyl acetate/hexanes gradient to provide 0.0734 g, 62% yield of **1k** as a white powder. mp 83 – 84 °C.  $^1H$  NMR (300.13 MHz,  $CDCl_3$ ):  $\delta$  8.22 – 8.14 (m, 4 H), 7.86 – 7.81 (m, 2 H), 7.75 – 7.69 (m, 1 H), 7.54 – 7.49 (m, 1 H), 7.40 – 7.34 (m, 2 H), 7.16 – 7.06 (m, 5 H).  $^{13}C$   $\{^1H\}$  NMR (75.48 MHz,  $CDCl_3$ ):  $\delta$  158.74, 157.00, 156.78, 148.41, 136.92, 134.80, 130.00, 129.83, 129.76, 129.28, 127.62, 127.15, 126.30, 123.77, 119.36, 119.07, 118.80. HRMS-EI ( $m/z$ ): calculated for  $C_{21}H_{15}NO$ : 297.1154; observed: 297.1150.

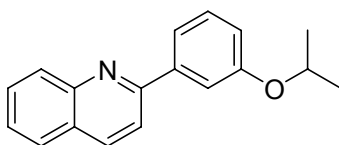

**2-(3-Isopropoxyphenyl)quinoline (1l).** The reaction was conducted with quinoline (0.3100 g, 2.400 mmol), 1-bromo-3-isopropoxy-benzene (0.0860 g, 0.400 mmol) and 1.0 mL of 1,4-dioxane at 175 °C for 24 h. The crude mixture was purified by flash chromatography using an ethyl acetate/hexanes gradient to provide 0.0741 g, 70% yield of **1l** as a clear, colorless oil.  $^1H$  NMR (300.13 MHz,  $CDCl_3$ ):  $\delta$  8.22 – 8.16 (m, 2 H), 7.87 – 7.81 (m, 2 H), 7.75 – 7.68 (m, 3 H), 7.55 – 7.50 (m, 1 H), 7.44 – 7.39 (m, 1 H), 7.01 – 6.98 (m, 1 H), 4.71 (sept,  $J$  = 6.00 Hz, 1 H), 1.39 (d,  $J$  = 6.00 Hz, 6 H).  $^{13}C$   $\{^1H\}$  NMR (75.48 MHz,  $CDCl_3$ ):  $\delta$  162.60,

<sup>1</sup> Cho, C. S.; Kim, B. T.; Choi, H.-J.; Kim, T.-J.; Shim, S. C. *Tetrahedron* **2003**, *59*, 7997.

158.67, 157.51, 148.50, 141.47, 137.00, 130.12, 130.05, 129.90, 127.73, 126.56, 120.12, 119.40, 117.17, 115.35, 70.24, 22.41. HRMS-EI ( $m/z$ ): calculated for  $C_{18}H_{17}NO$ : 263.1310; observed: 263.1315.

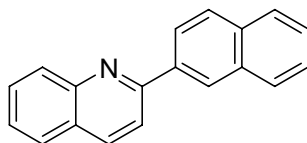

**2-(2-Naphthyl)-quinoline (1m).** The reaction was conducted with quinoline (0.3100 g, 2.400 mmol), 2-bromonaphthalene (0.0828 g, 0.400 mmol) and 1.0 mL of 1,4-dioxane at 175 °C for 24 h. The crude mixture was purified by flash chromatography using an ethyl acetate/hexanes gradient to provide 0.0772 g, 76% yield of **1m** as a white powder. mp 162 – 163 °C (lit. 162 – 163 °C).<sup>1</sup>  $^1H$  NMR (300.13 MHz,  $CDCl_3$ ):  $\delta$  8.62 (br s, 1 H), 8.39 – 8.36 (m, 1 H), 8.28 – 8.20 (m, 2 H), 8.06 – 7.98 (m, 3 H), 7.90 – 7.84 (m, 2 H), 7.78 – 7.72 (m, 1 H), 7.57 – 7.52 (m, 3 H).  $^{13}C$  { $^1H$ } NMR (100.61 MHz,  $CDCl_3$ ):  $\delta$  157.27, 148.51, 137.10, 136.95, 134.00, 133.65, 129.89, 129.00, 128.75, 127.89, 127.67, 127.37, 127.30, 126.88, 126.50, 125.23, 119.29. HRMS-EI ( $m/z$ ): calculated for  $C_{19}H_{13}N$ : 255.1048; observed: 255.1043.

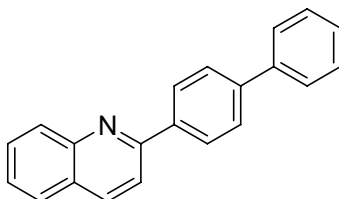

**2-((1,1'-Biphenyl)-4-yl)-quinoline (1n).** The reaction was conducted with quinoline (0.3100 g, 2.400 mmol), 1-bromo-4-phenyl-benzene (0.0932 g, 0.400 mmol) and 1.0 mL of 1,4-dioxane at 175 °C for 24 h. The crude mixture was purified by flash chromatography using an ethyl acetate/hexanes gradient to provide 0.0650 g, 58% yield of **1n** as a white powder. mp 175 – 177 °C (lit. 175 – 177 °C).<sup>2</sup>  $^1H$  NMR (300.13 MHz,  $CDCl_3$ ):  $\delta$  8.27 – 8.23 (m, 3 H), 8.20 – 8.17 (m, 1 H), 7.95 – 7.92 (m, 1 H), 7.85 – 7.83 (m, 1 H), 7.78 – 7.67 (m, 5 H), 7.56 – 7.45 (m, 3 H), 7.40 – 7.38 (m, 1 H).  $^{13}C$  { $^1H$ } NMR (75.48 MHz,  $CDCl_3$ ):  $\delta$  157.04, 148.51, 142.22, 140.75, 138.69, 136.97, 129.92, 129.88, 129.04, 128.14, 127.77, 127.73, 127.67, 127.39, 127.32, 126.47, 119.05. HRMS-EI ( $m/z$ ): calculated for  $C_{21}H_{15}N$ : 281.1205; observed: 281.1202.

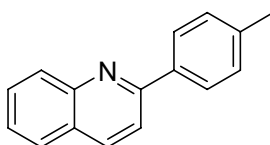

**2-(4-Methylphenyl)-quinoline (1o).** The reaction was conducted with quinoline (0.3100 g, 2.400 mmol), 1-bromo-4-methyl-benzene (0.0684 g, 0.400 mmol) and 1.0 mL of 1,4-dioxane at 175 °C for 24 h. The crude mixture was purified by flash chromatography using an ethyl acetate/hexanes gradient to provide 0.0608 g,

<sup>2</sup> Steinkopf, W. *Justus Liebigs Ann. Chem.* **1940**, 543, 119.

69% yield of **1o** as a white powder. mp 82 – 83 °C (lit. 80 – 81 °C).<sup>1</sup> <sup>1</sup>H NMR (300.13 MHz, CDCl<sub>3</sub>): δ 8.21 – 8.18 (m, 1 H), 8.17 – 8.14 (m, 1 H), 8.08 – 8.06 (m, 2 H), 7.88 – 7.85 (m, 1 H), 7.83 – 7.80 (m, 1 H), 7.74 – 7.68 (m, 1 H), 7.53 – 7.48 (m, 1 H), 7.34 – 7.32 (m, 2 H), 2.43 (s, 3 H). <sup>13</sup>C {<sup>1</sup>H} NMR (100.61 MHz, CDCl<sub>3</sub>): δ 157.47, 148.44, 139.55, 137.02, 136.82, 129.82, 129.74, 129.48, 127.60, 127.25, 126.24, 119.01, 21.53. HRMS-EI (*m/z*): calculated for C<sub>16</sub>H<sub>13</sub>N: 219.1048; observed: 219.1043.

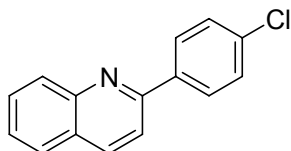

**2-(4-Chlorophenyl)-quinoline (1p).** The reaction was conducted with quinoline (0.3100 g, 2.400 mmol), 1-bromo-4-chloro-benzene (0.0766 g, 0.400 mmol) and 1.0 mL of 1,4-dioxane at 175 °C for 24 h. The crude mixture was purified by flash chromatography using an ethyl acetate/hexanes gradient to provide 0.0650 g, 68% yield of **1p** as a white powder. mp 111 – 112 °C (lit. 112 – 114 °C).<sup>3</sup> <sup>1</sup>H NMR (300.13 MHz, CDCl<sub>3</sub>): δ 8.26 – 8.22 (m, 1 H), 8.17 – 8.11 (m, 3 H), 7.87 – 7.81 (m, 2 H), 7.78 – 7.71 (m, 1 H), 7.57 – 7.49 (m, 3 H). <sup>13</sup>C {<sup>1</sup>H} NMR (100.61 MHz, CDCl<sub>3</sub>): δ 156.13, 148.38, 138.19, 137.12, 135.69, 130.01, 129.86, 129.18, 128.98, 127.66, 127.37, 126.67, 118.71. HRMS-EI (*m/z*): calculated for C<sub>15</sub>H<sub>10</sub>ClN: 239.0502; observed: 239.0500.

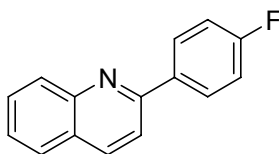

**2-(4-Fluorophenyl)-quinoline (1q).** The reaction was conducted with quinoline (0.3100 g, 2.400 mmol), 1-bromo-4-fluoro-benzene (0.0700 g, 0.400 mmol) and 1.0 mL of 1,4-dioxane at 175 °C for 24 h. The crude mixture was purified by flash chromatography using an ethyl acetate/hexanes gradient to provide 0.0630 g, 71% yield of **1q** as a white powder. mp 94 – 95 °C (lit. 92 – 93 °C).<sup>1</sup> <sup>1</sup>H NMR (300.13 MHz, CDCl<sub>3</sub>): δ 8.24 – 8.14 (m, 4 H), 7.85 – 7.82 (m, 2 H), 7.76 – 7.70 (m, 1 H), 7.56 – 7.50 (m, 1 H), 7.24 – 7.18 (m, 2 H). <sup>13</sup>C {<sup>1</sup>H} NMR (100.61 MHz, CDCl<sub>3</sub>): δ 165.17, 162.70, 156.33, 148.36, 137.04, 135.95, 135.92, 129.94, 129.78, 129.59, 129.51, 127.64, 127.21, 126.49, 118.74, 116.03, 115.81. <sup>19</sup>F NMR (376.50 MHz, CDCl<sub>3</sub>): δ -111.71. HRMS-EI (*m/z*): calculated for C<sub>15</sub>H<sub>10</sub>FN: 223.0797; observed: 223.0792.

<sup>3</sup> Shi, D.; Rong, L.; Shi, C.; Zhuang, Q.; Wang, X.; Tu, S.; Hu, H. *Synthesis* **2005**, 5, 717.



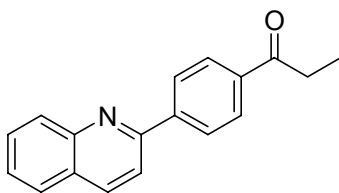

**2-((Propriophenone)-4'-yl)-quinoline (1r).** The reaction was conducted with quinoline (0.3100 g, 2.400 mmol), 4'-bromopropiophenone (0.0852 g, 0.400 mmol) and 1.0 mL of 1,4-dioxane at 175 °C for 24 h. The crude mixture was purified by flash chromatography using an ethyl acetate/hexanes gradient to provide 0.0757 g, 72% yield of **1r** as a white powder. mp 130 – 131 °C. <sup>1</sup>H NMR (300.13 MHz, CDCl<sub>3</sub>): δ 8.29 – 8.26 (m, 3 H), 8.21 – 8.18 (m, 1 H), 8.14 – 8.11 (m, 2 H), 7.94 – 7.91 (m, 1 H), 7.87 – 7.84 (m, 1 H), 7.79 – 7.74 (m, 1 H), 7.59 – 7.55 (m, 1 H), 3.08 (q, *J* = 7.20 Hz, 2 H), 1.27 (t, *J* = 7.20 Hz, 3 H). <sup>13</sup>C {<sup>1</sup>H} NMR (100.61 MHz, CDCl<sub>3</sub>): δ 200.71, 156.11, 148.44, 143.75, 137.29, 137.18, 130.09, 130.02, 128.68, 127.83, 127.69, 127.56, 126.95, 119.10, 32.18, 8.42. HRMS-EI (*m/z*): calculated for C<sub>18</sub>H<sub>15</sub>NO: 261.1154; observed: 261.1150.

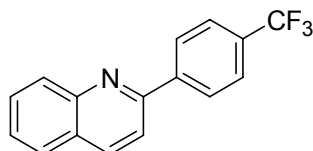

**2-(4-(Trifluoromethyl)phenyl)-quinoline (1s).** The reaction was conducted with quinoline (0.3100 g, 2.400 mmol), 1-bromo-4-(trifluoromethyl)-benzene (0.0900 g, 0.400 mmol) and 1.0 mL of 1,4-dioxane at 175 °C for 24 h. The crude mixture was purified by flash chromatography using an ethyl acetate/hexanes gradient to provide 0.0712 g, 65% yield of **1s** as a white powder. mp 124 – 126 °C. <sup>1</sup>H NMR (300.13 MHz, CDCl<sub>3</sub>): δ 8.30 – 8.26 (m, 3 H), 8.20 – 8.17 (m, 1 H), 7.91 – 7.84 (m, 2 H), 7.79 – 7.73 (m, 3 H), 7.59 – 7.54 (m, 1 H). <sup>13</sup>C {<sup>1</sup>H} NMR (100.61 MHz, CDCl<sub>3</sub>): δ 155.80, 148.43, 143.09, 137.29, 131.38, 131.06, 130.17, 130.02, 128.00, 127.71, 127.60, 127.03, 125.93, 125.90, 125.75, 123.05, 118.93. <sup>19</sup>F NMR (376.50 MHz, CDCl<sub>3</sub>): δ -61.75. HRMS-EI (*m/z*): calculated for C<sub>16</sub>H<sub>10</sub>F<sub>3</sub>N: 273.0765; observed: 273.0766.

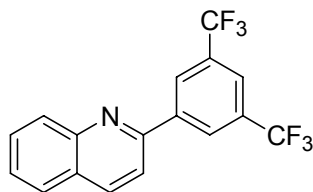

**2-(3,5-Bis(trifluoromethyl)phenyl)-quinoline (1t).** The reaction was conducted with quinoline (0.3100 g, 2.400 mmol), 1-bromo-3,5-bis(trifluoromethyl)-benzene (0.1172 g, 0.400 mmol) and 1.0 mL of 1,4-dioxane at 175 °C for 24 h. The crude mixture was purified by flash chromatography using an ethyl acetate/hexanes gradient to provide 0.0610 g, 45% yield of **1t** as a white powder. mp 95 – 96 °C. <sup>1</sup>H NMR (300.13 MHz, CDCl<sub>3</sub>): δ 8.66 (br s, 2 H), 8.33 – 8.31 (m, 1 H), 8.22 – 8.19 (m, 1 H), 7.96 – 7.86 (m, 3 H), 7.82 – 7.76 (m, 1 H), 7.63 – 7.57 (m, 1 H). <sup>13</sup>C {<sup>1</sup>H} NMR (100.61 MHz, CDCl<sub>3</sub>): δ 153.87, 148.43, 141.71, 137.77, 132.54,

132.21, 131.87, 130.54, 130.13, 127.79, 127.52, 125.00, 122.97, 122.29, 118.34.  
<sup>19</sup>F NMR (376.50 MHz, CDCl<sub>3</sub>): δ -61.82. HRMS-EI (*m/z*): calculated for  
C<sub>17</sub>H<sub>9</sub>F<sub>6</sub>N: 341.0639; observed: 341.0632.

**Mechanistic Possibilities.** Presented below are two working mechanistic hypotheses for the Rh(I)-catalyzed direct arylation reaction.

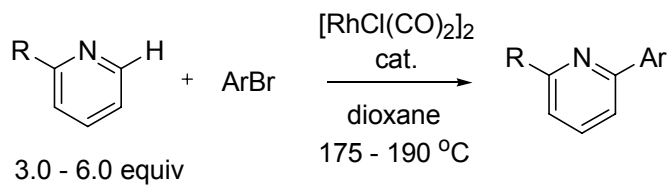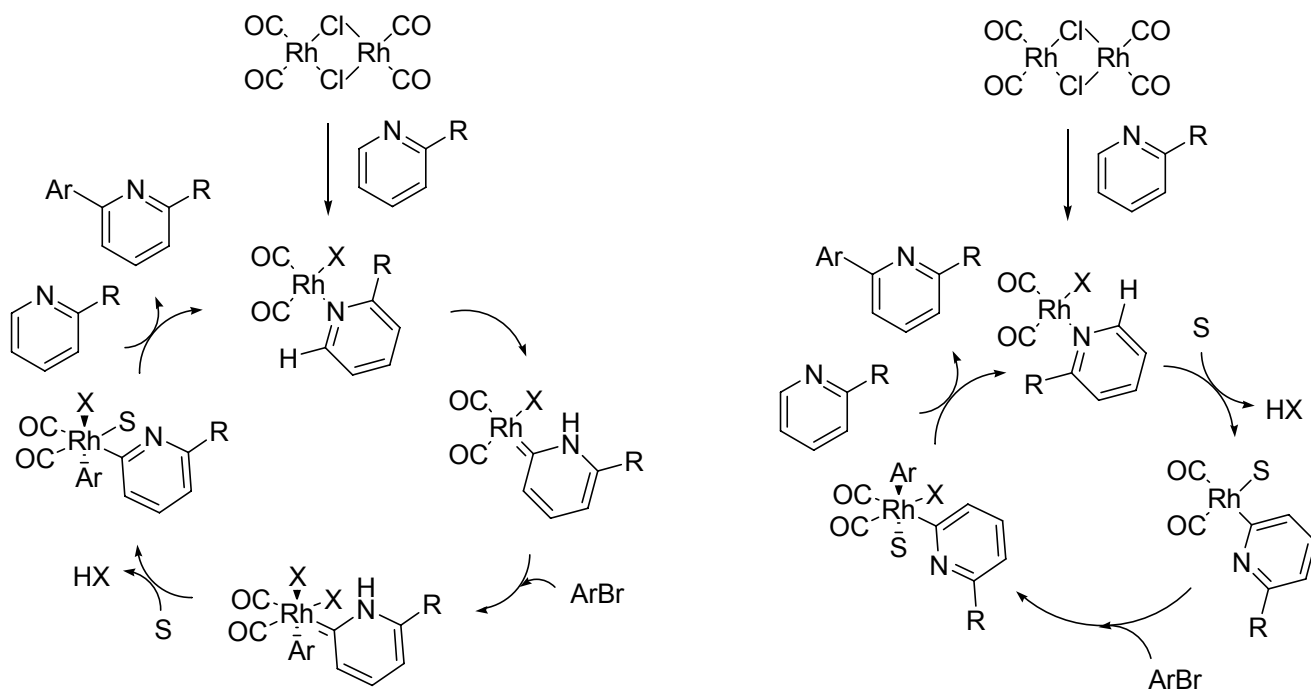

S = solvent and/or *N*-bound heterocycle

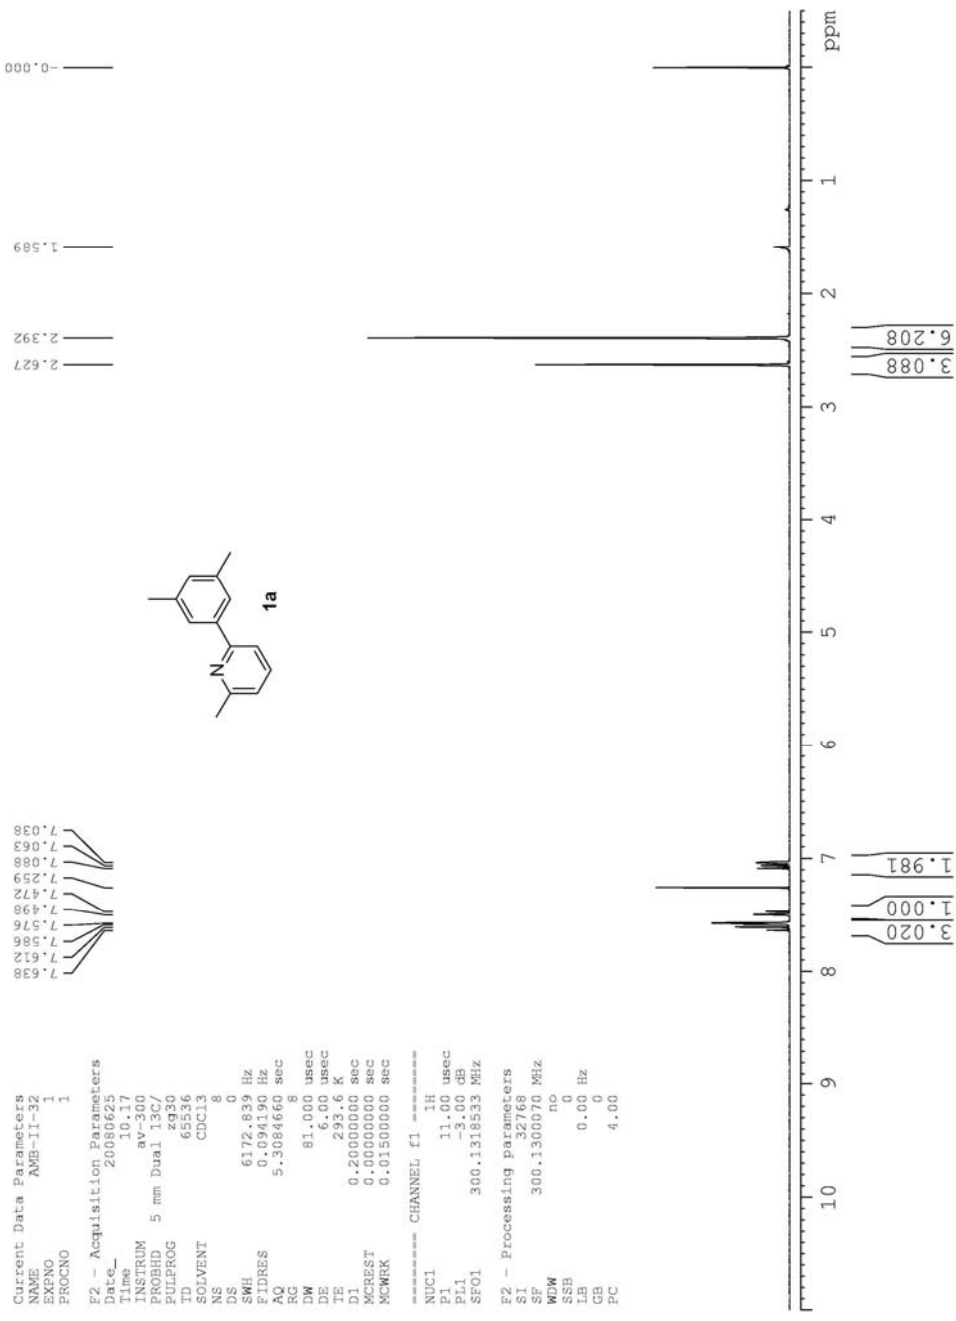

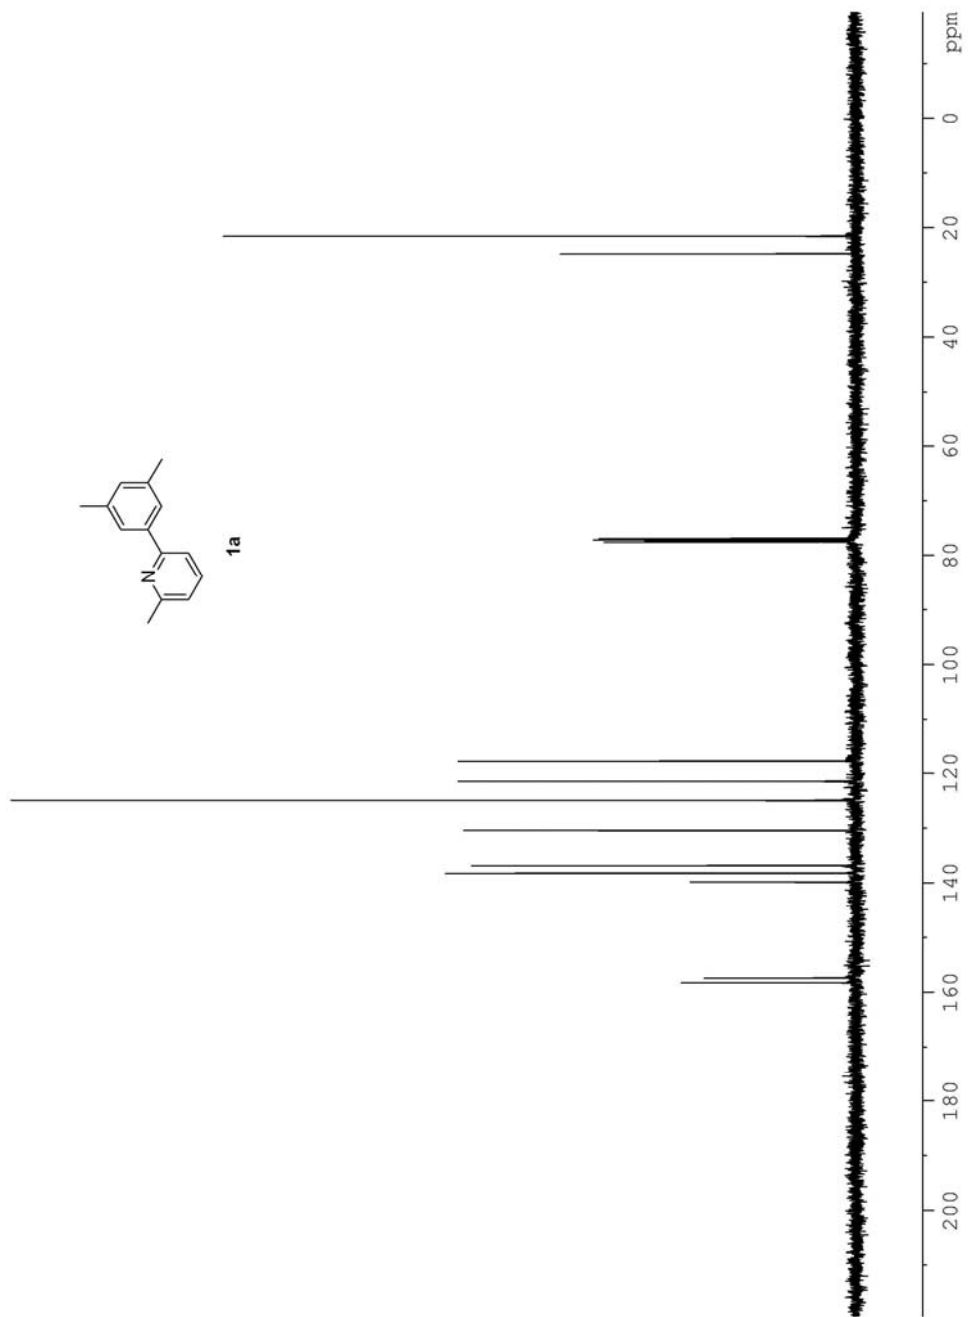

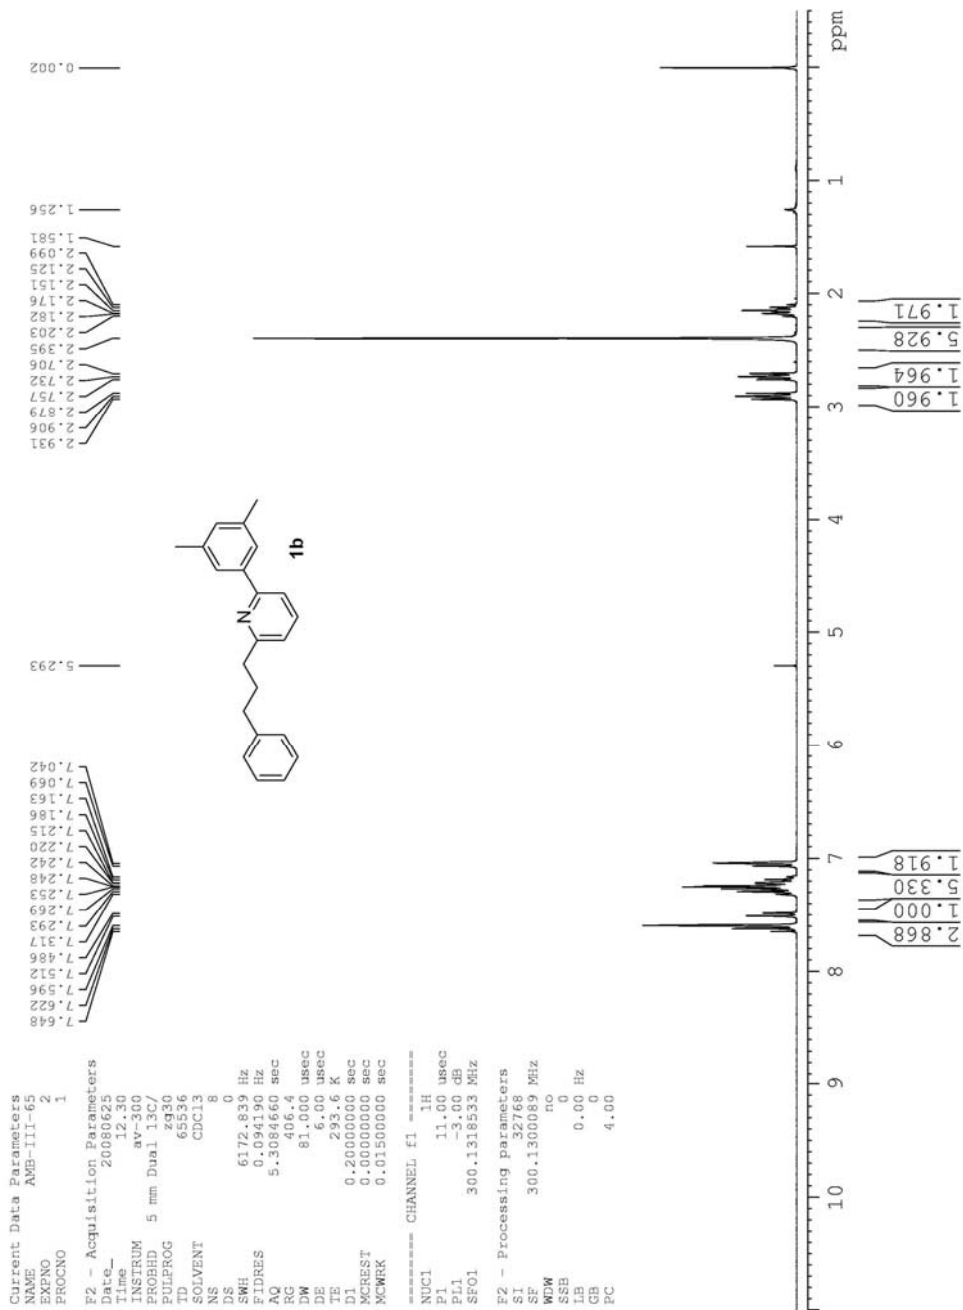

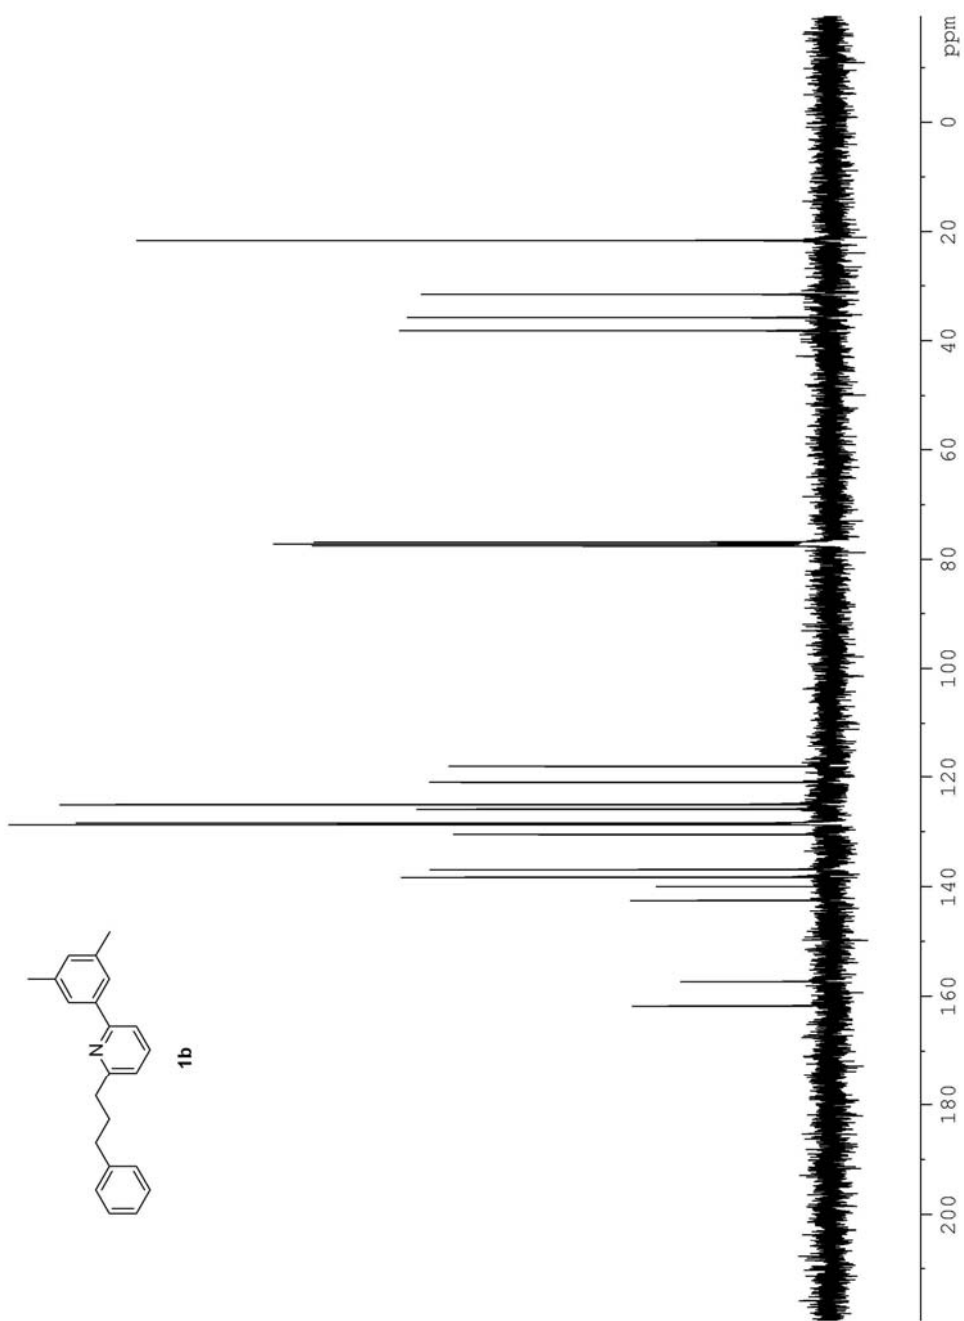

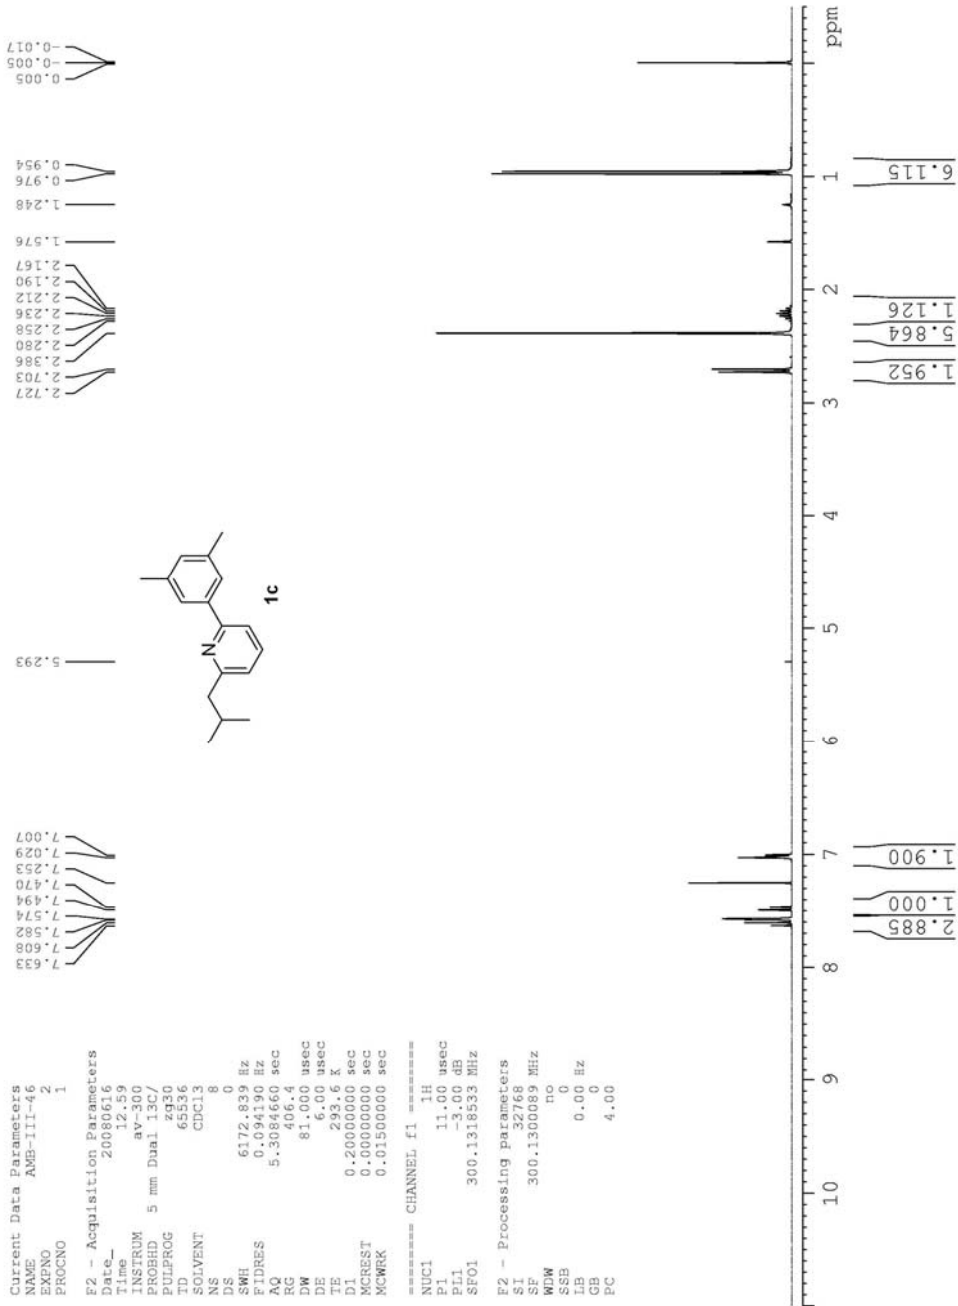



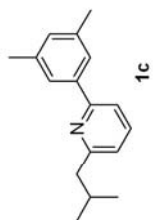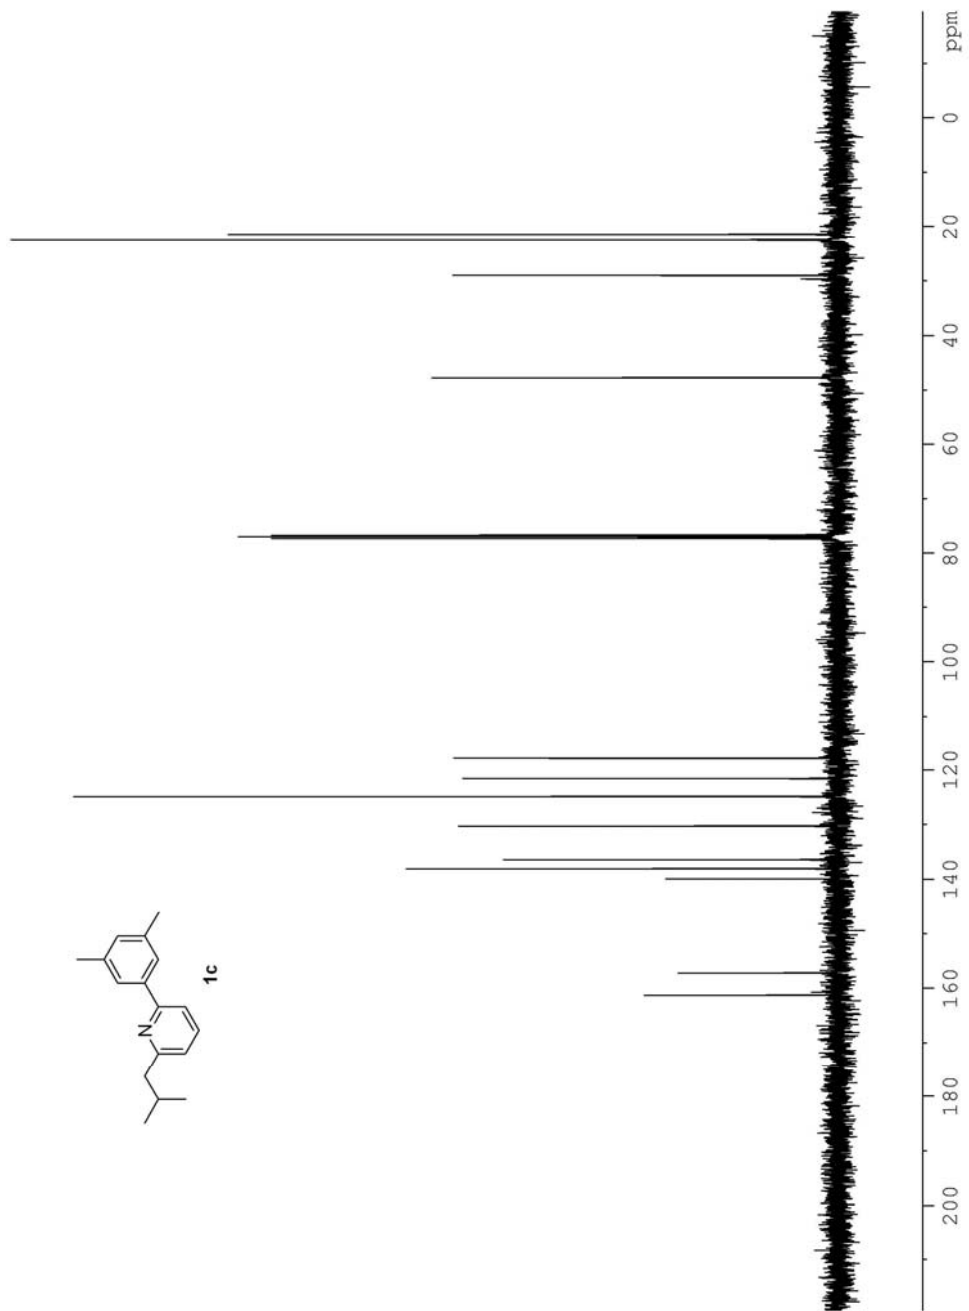



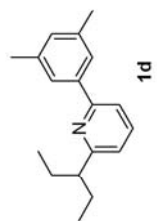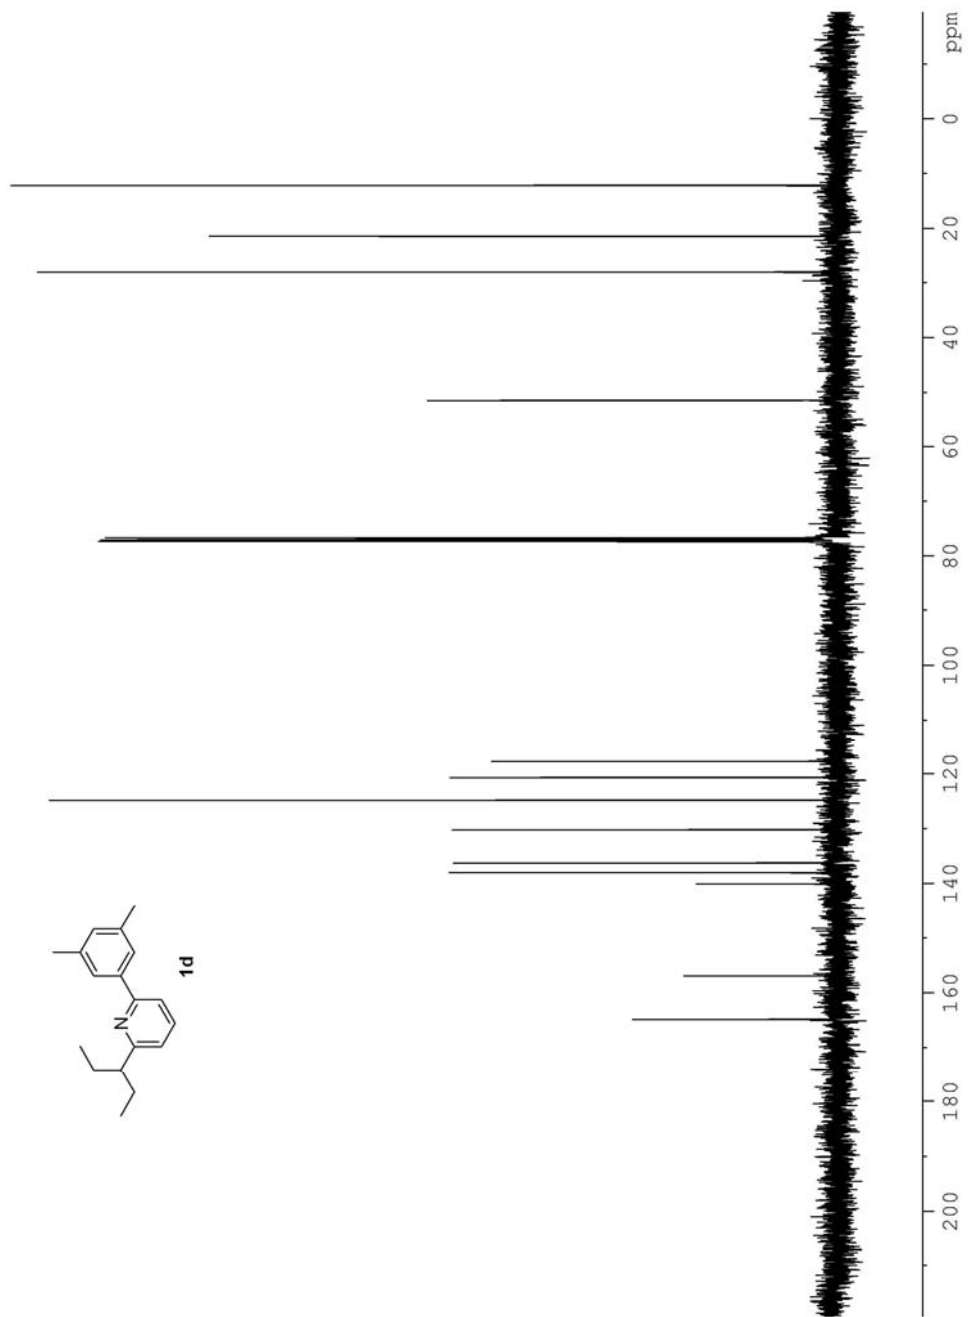

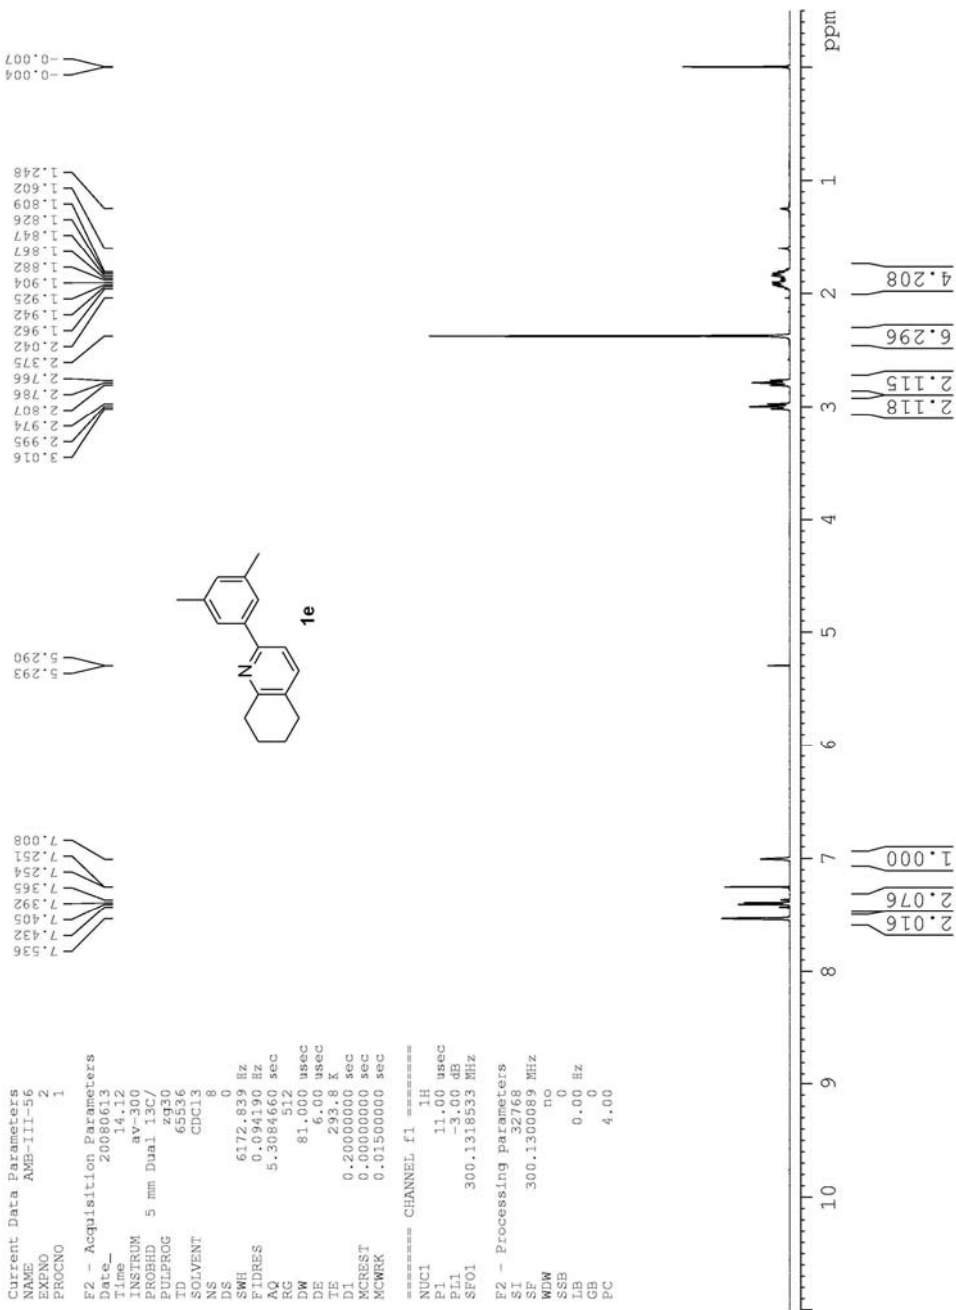

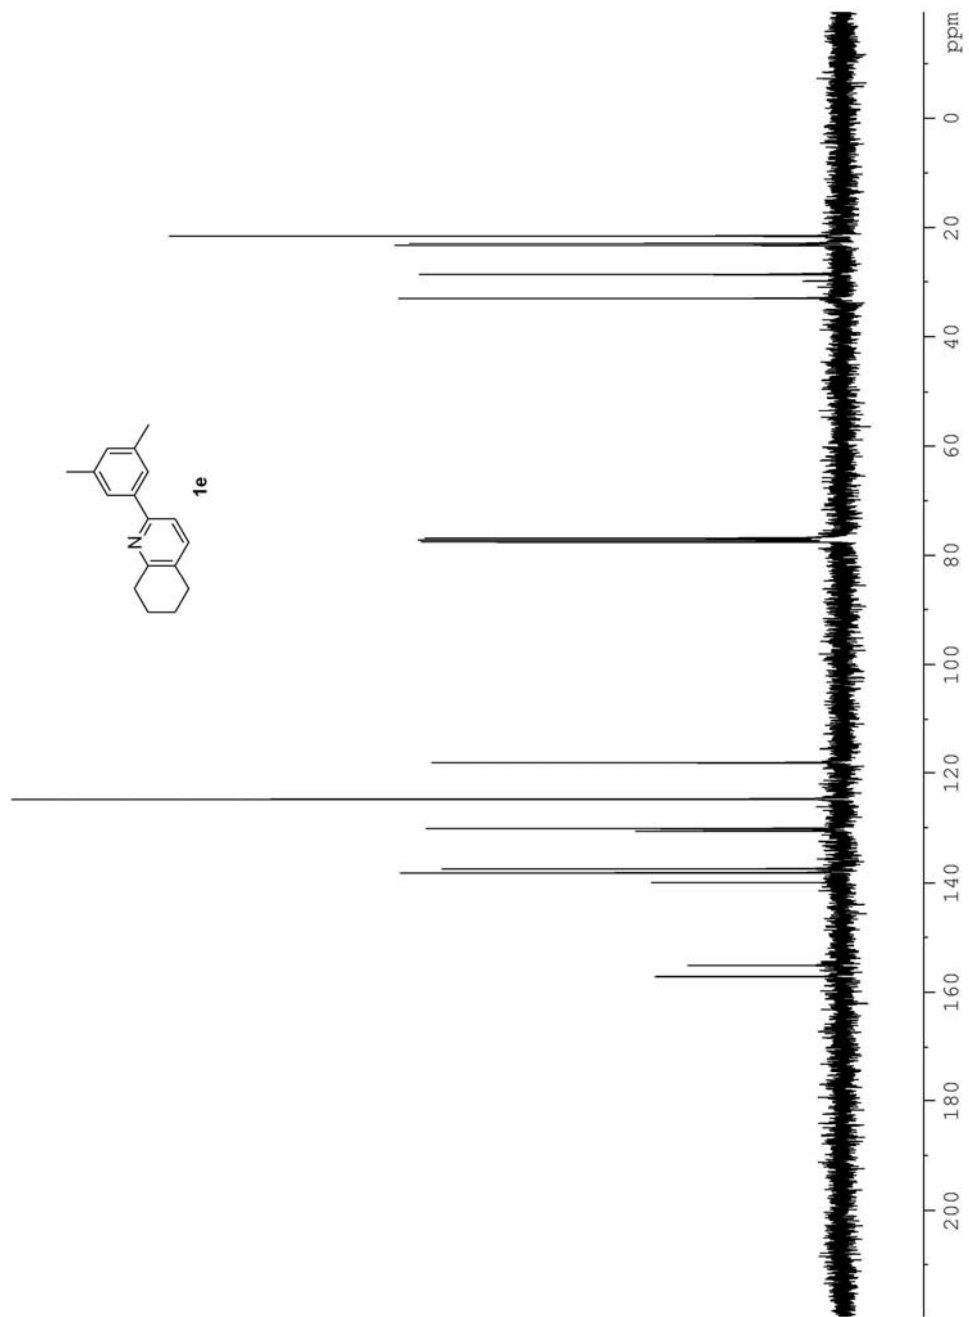

Current Data Parameters  
 NAME AMB-III-75  
 EXPNO 1  
 PROCNO 1

F2 - Acquisition Parameters  
 Date\_ 20080702  
 Time 14.22  
 INSTRUM av-300  
 PROBHD 5 mm Dual 13C/  
 PULPROG zg30  
 ID 65536  
 SOLVENT CDCl3  
 NS 8  
 SH 6  
 SWH 6172.839 Hz  
 FIDRES 0.094190 Hz  
 AQ 5.3084660 sec  
 RG 456.1  
 DW 81.000 usec  
 DE 6.00 usec  
 TE 293.7 K  
 D1 0.20000000 sec  
 MCREST 0.00000000 sec  
 MCWRK 0.01500000 sec

===== CHANNEL F1 =====  
 NUC1 1H  
 P1 11.00 usec  
 PL1 -3.00 dB  
 SF01 300.1318533 MHz

F2 - Processing parameters  
 SI 32768  
 SF 300.1300089 MHz  
 SW 4096  
 ISB HO  
 TB 0.00 Hz  
 GB 0  
 PC 4.00

7.554  
7.307  
7.253  
7.019  
6.909

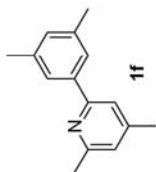

2.575  
2.381  
2.379  
2.349

1.634  
1.249  
0.876

0.067  
0.005  
-0.016

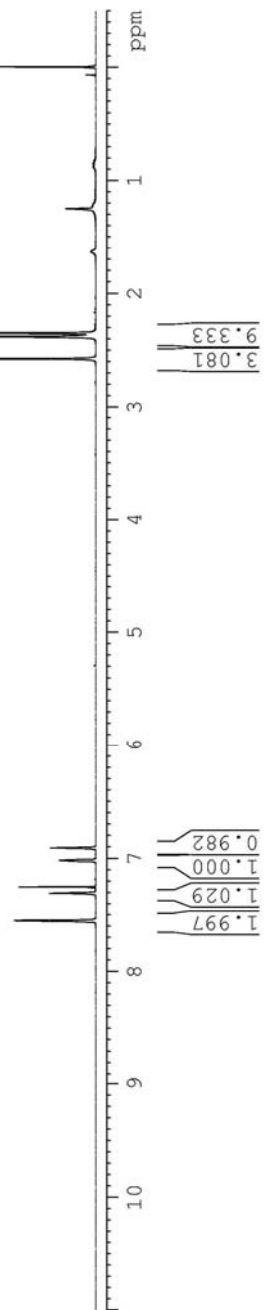

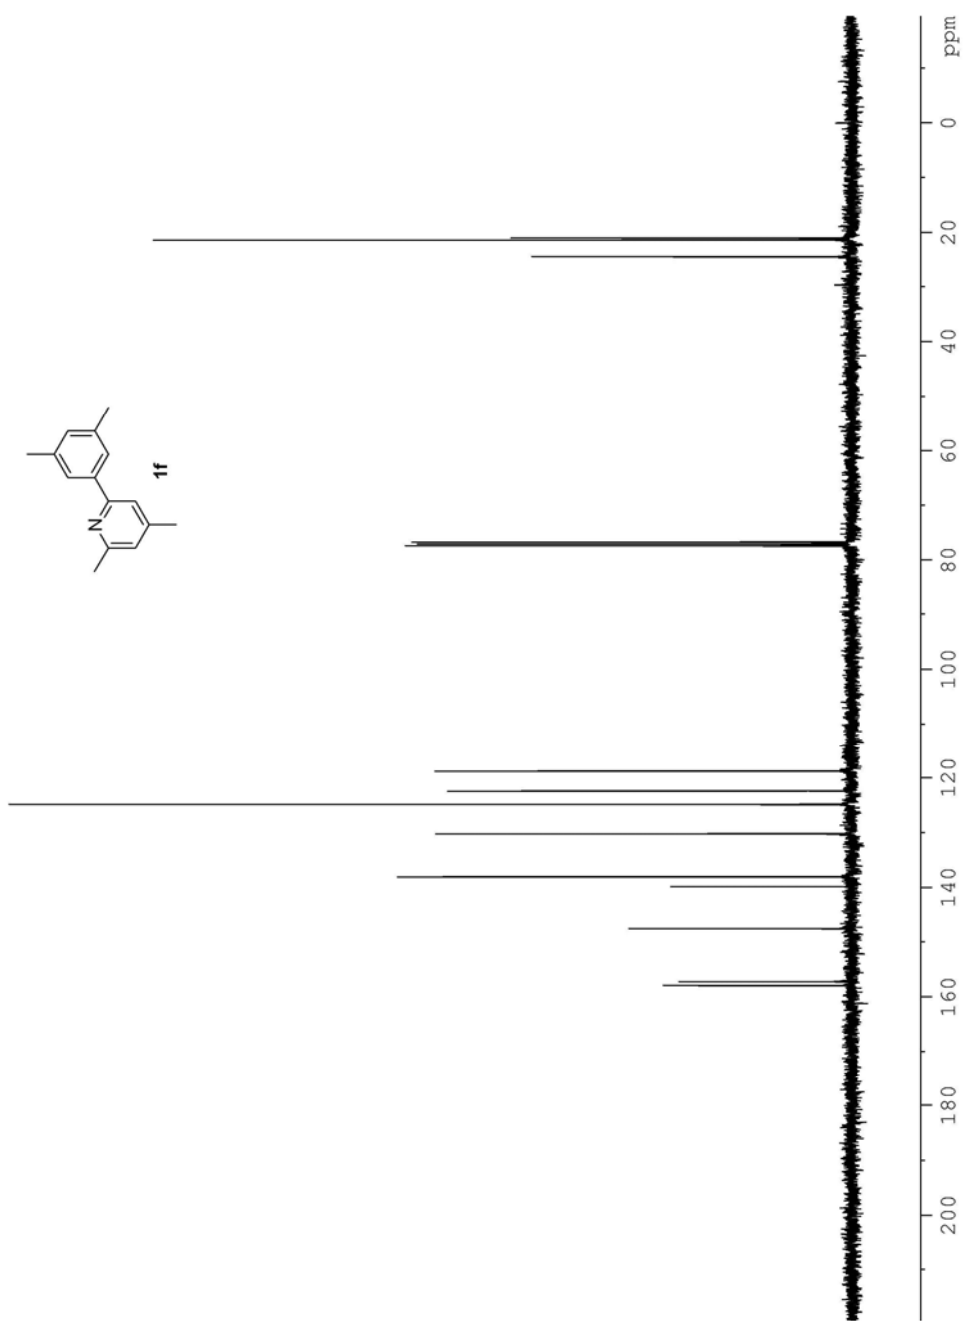

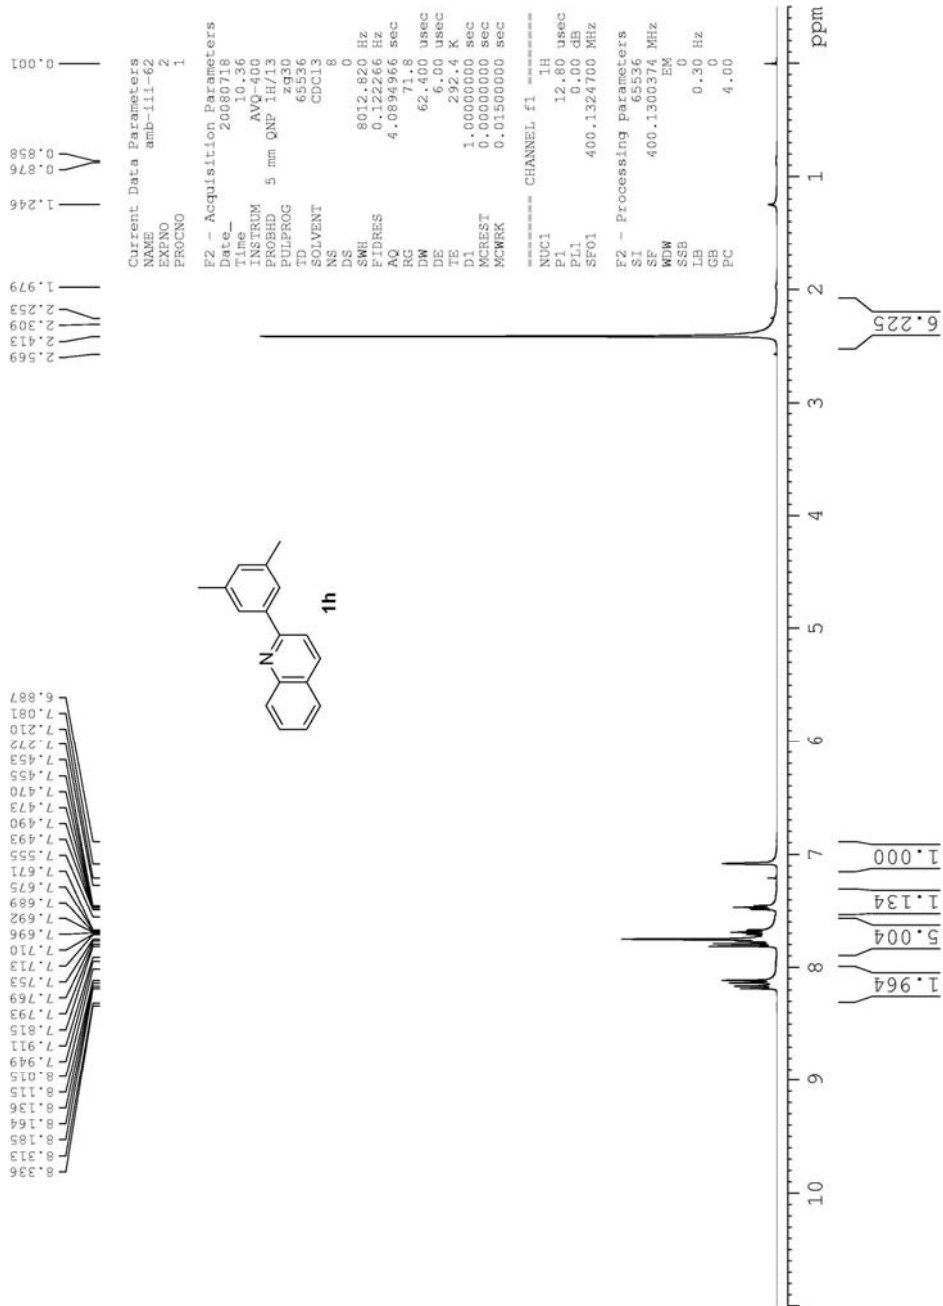



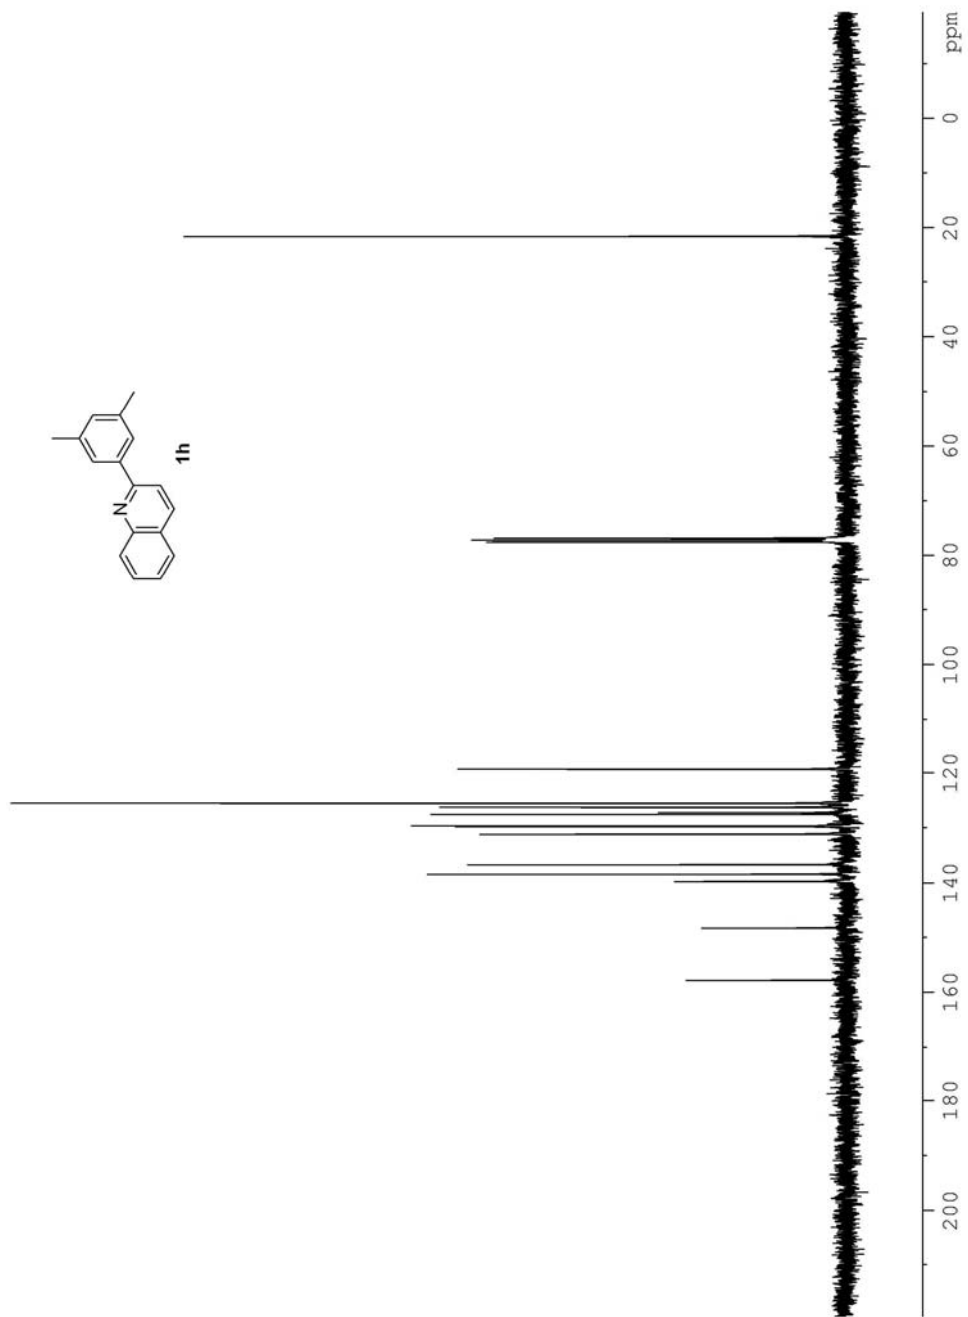



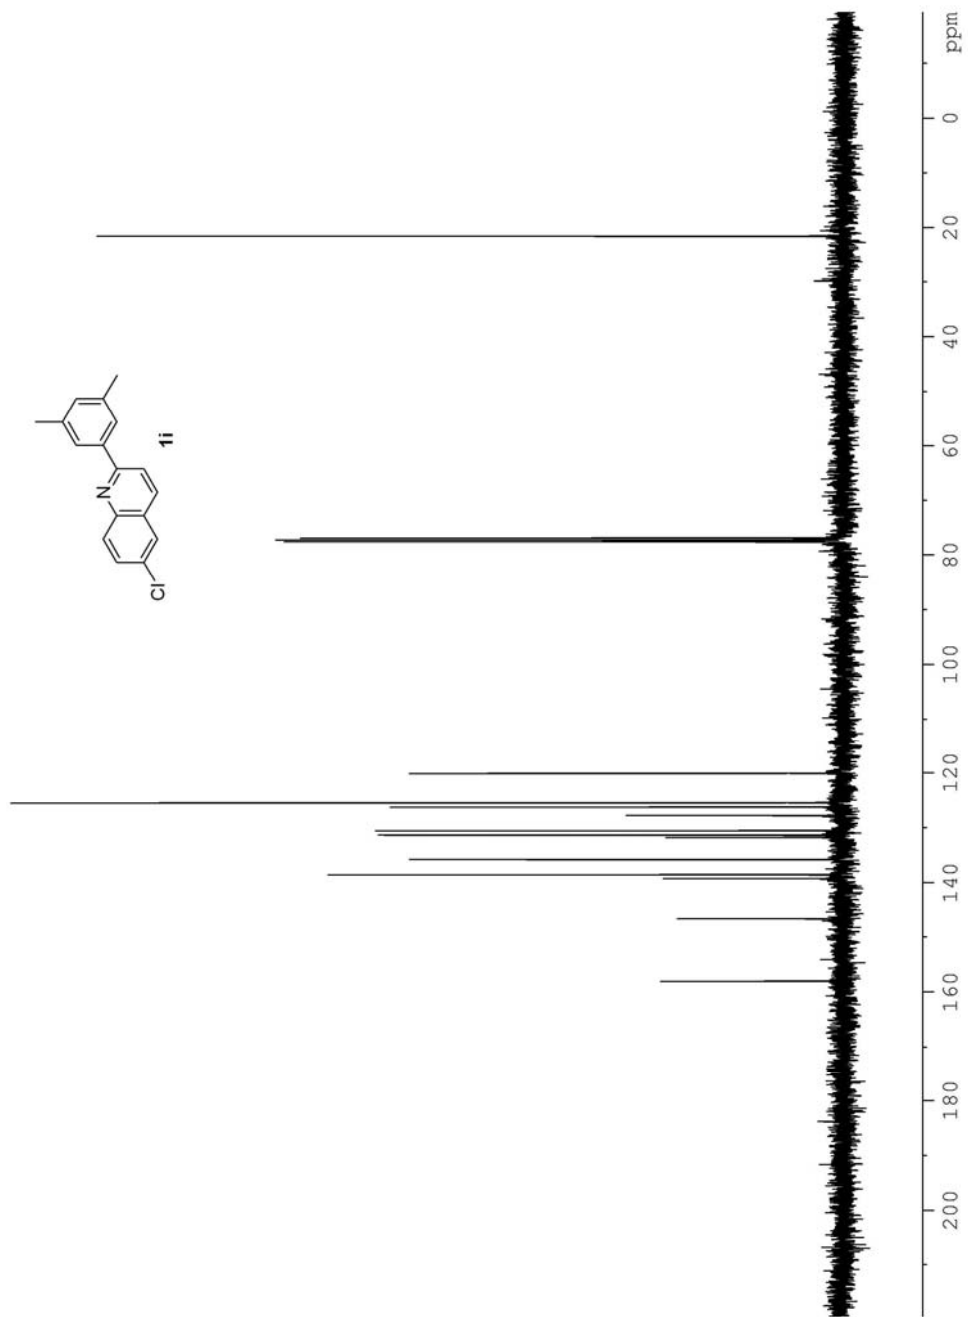

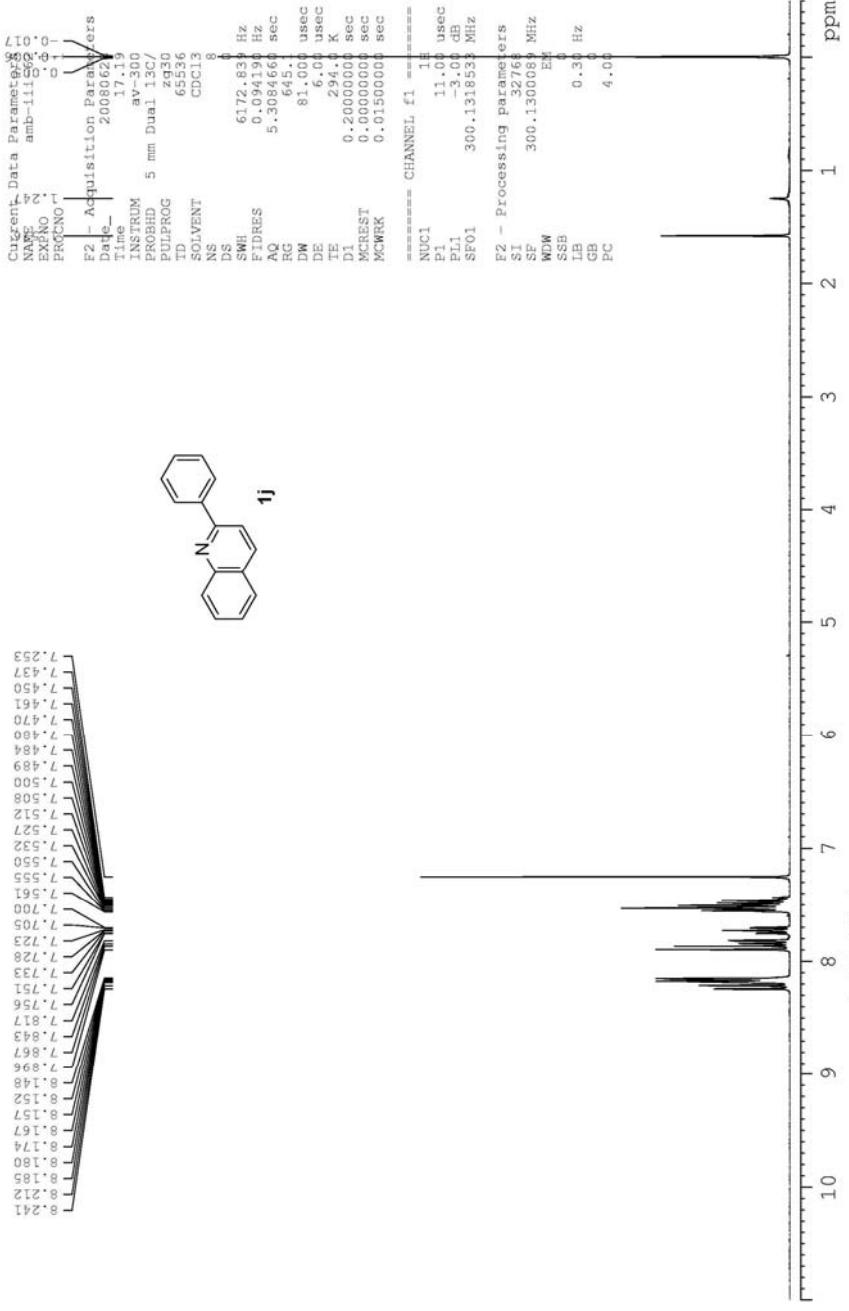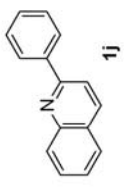

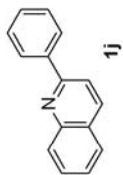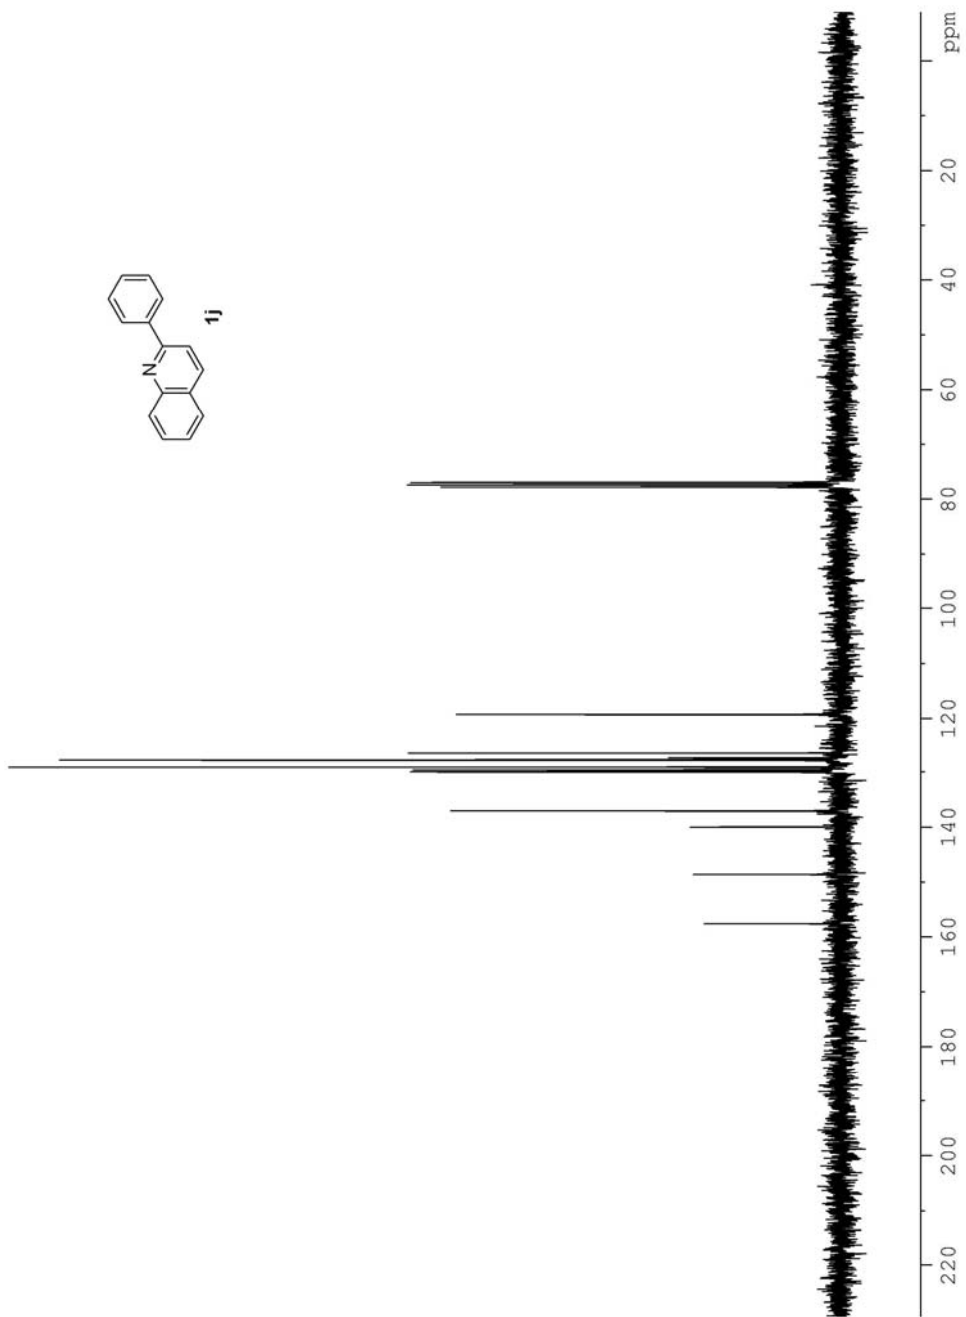

Current Data Parameters  
 Name: W-AMB-III-522  
 Exp No: 1  
 Proc No: 1  
 F2 - Acquisition Parameters  
 Date: 20080619  
 Time: 17.28  
 INSTRUM: av-300  
 PROBD: 5 mm Dual 13C/  
 PULPROG: zg30  
 ID: 65536  
 SOLVENT: CDCl3  
 NS: 6  
 DS: 4  
 SWH: 6172.839 Hz  
 FIDRES: 0.1094190 Hz  
 AQ: 5.3084660 sec  
 RG: 645.1  
 DW: 81.000 usec  
 DE: 6.00 usec  
 TE: 293.2 K  
 D1: 0.20000000 sec  
 MCREST: 0.00000000 sec  
 MCWRK: 0.01500000 sec  
 ===== CHANNEL f1 =====  
 NUC1: 1H  
 P1: 11.00 usec  
 PL1: -3.00 dB  
 SF01: 300.1318553 MHz  
 F2 - Processing parameters  
 SI: 32768  
 SF: 300.1300089 MHz  
 SW: 10000  
 SSB: 0  
 GB: 0.00 Hz  
 PC: 4.00

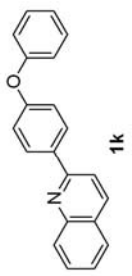

8.222  
8.193  
8.164  
8.157  
8.142  
8.135  
7.860  
7.832  
7.806  
7.748  
7.743  
7.725  
7.720  
7.696  
7.692  
7.542  
7.539  
7.515  
7.492  
7.397  
7.373  
7.369  
7.344  
7.253  
7.164  
7.157  
7.142  
7.136  
7.117  
7.095  
7.091  
7.066  
7.063

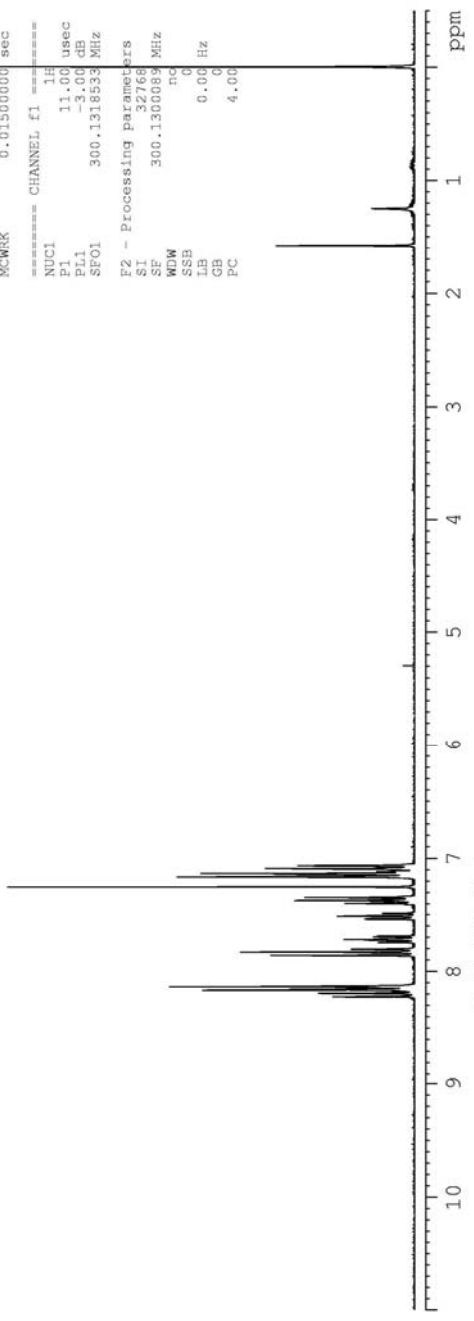

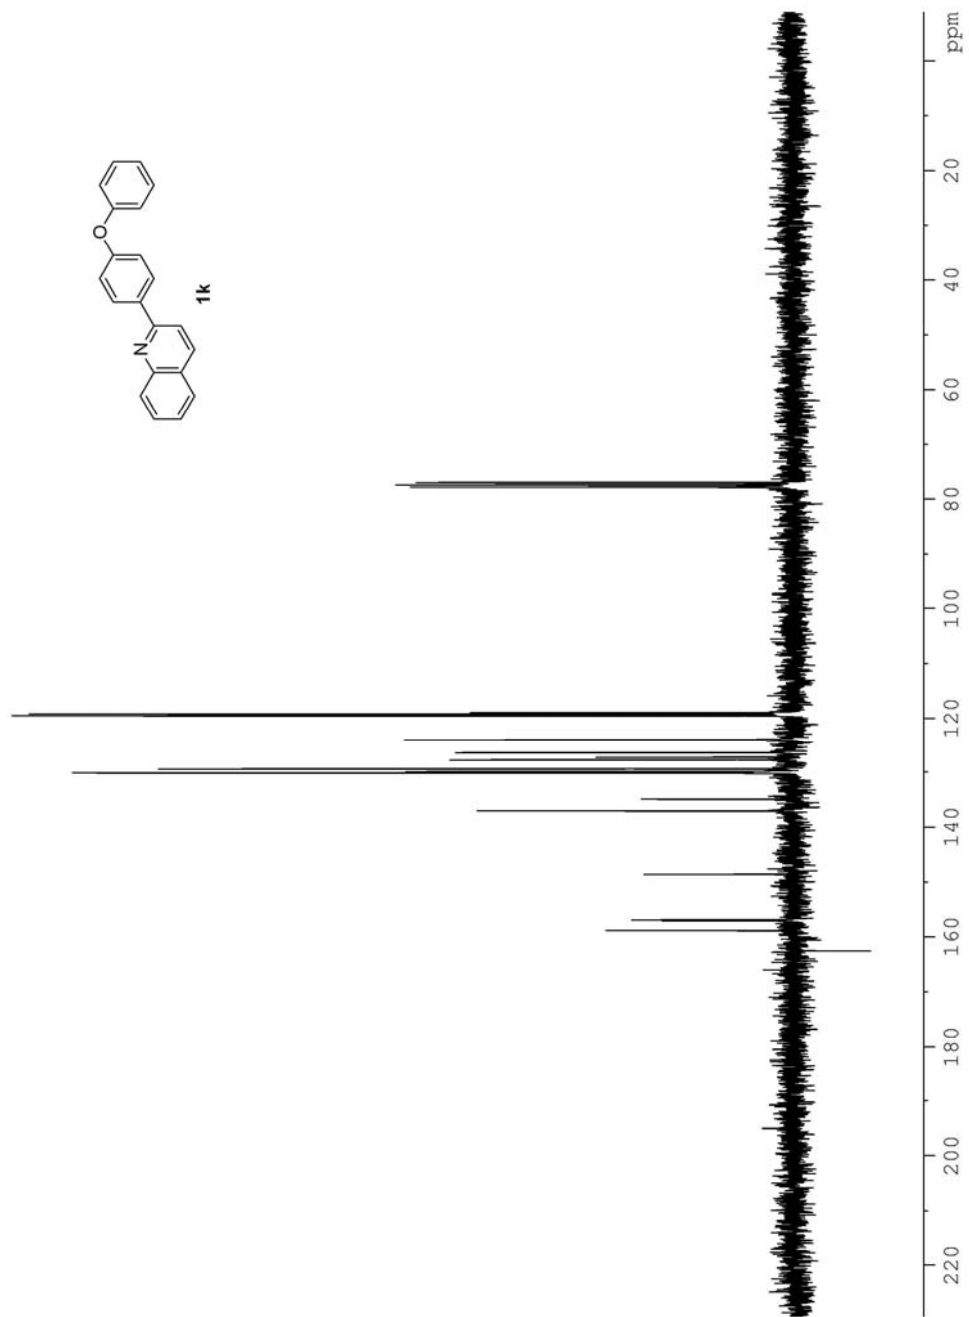

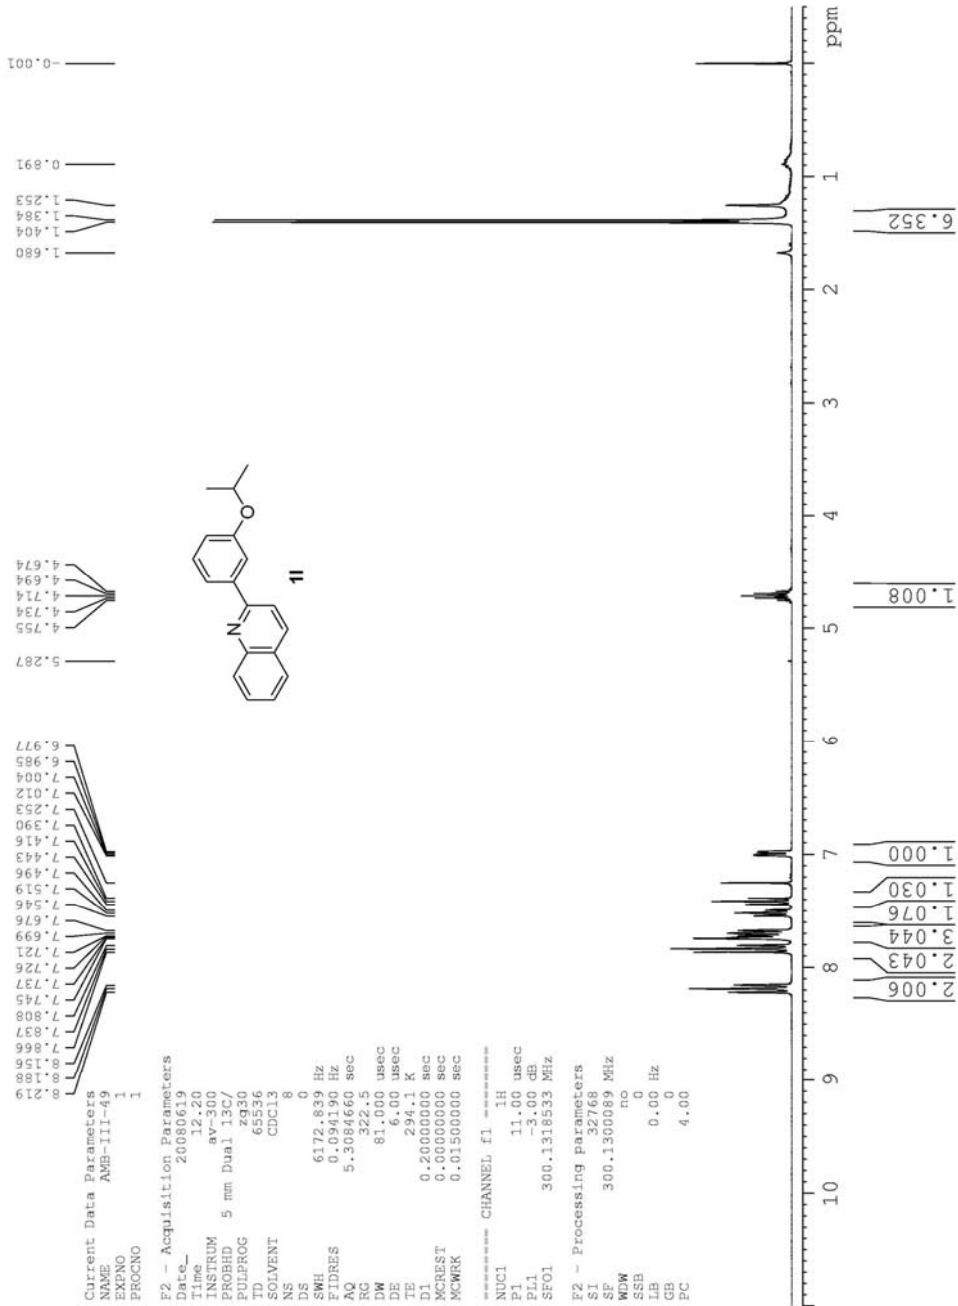



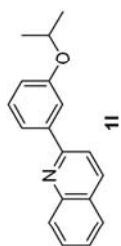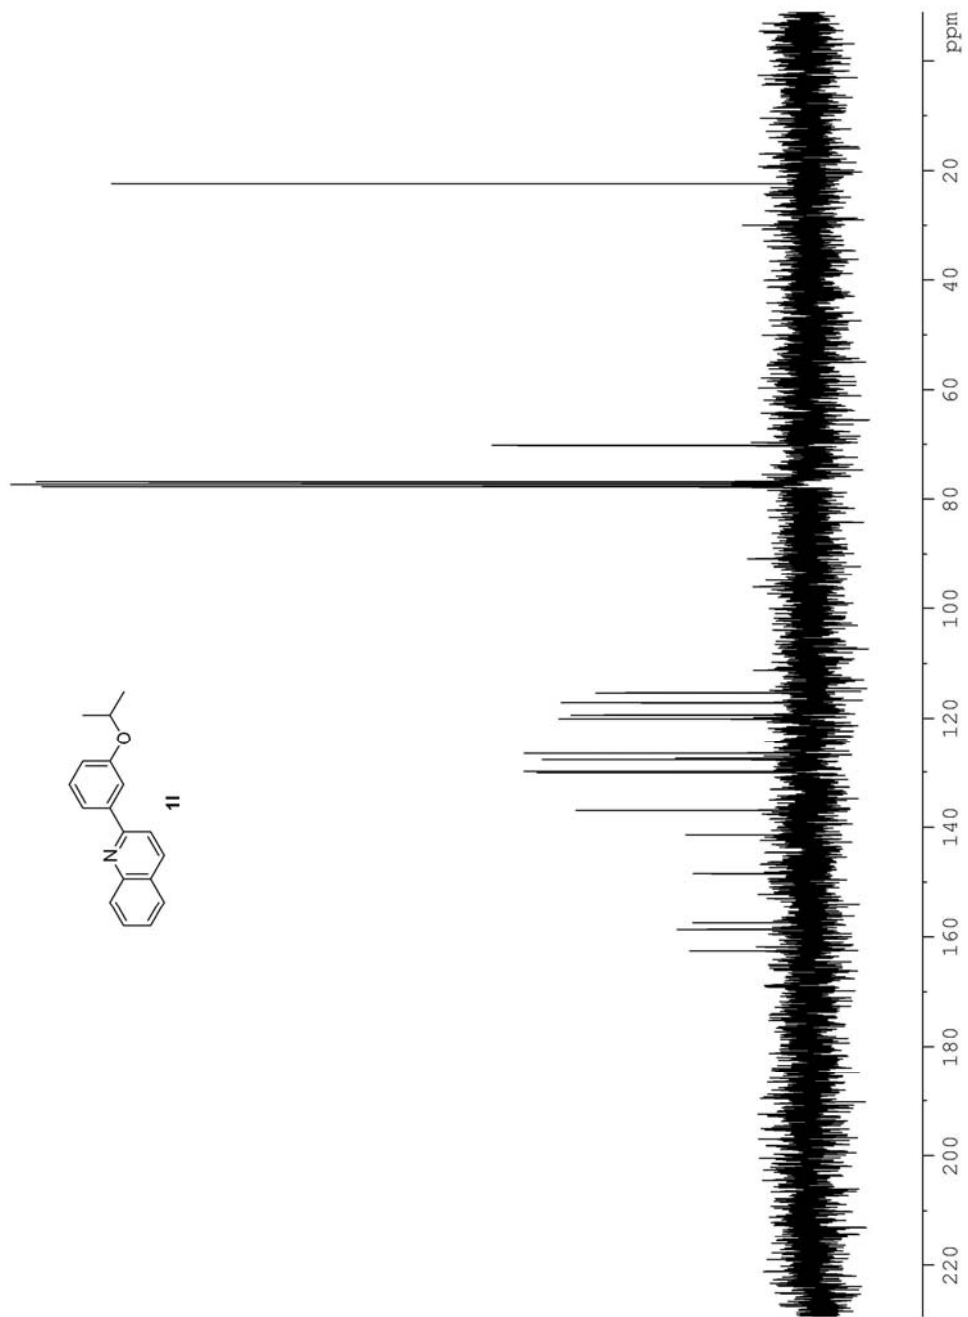

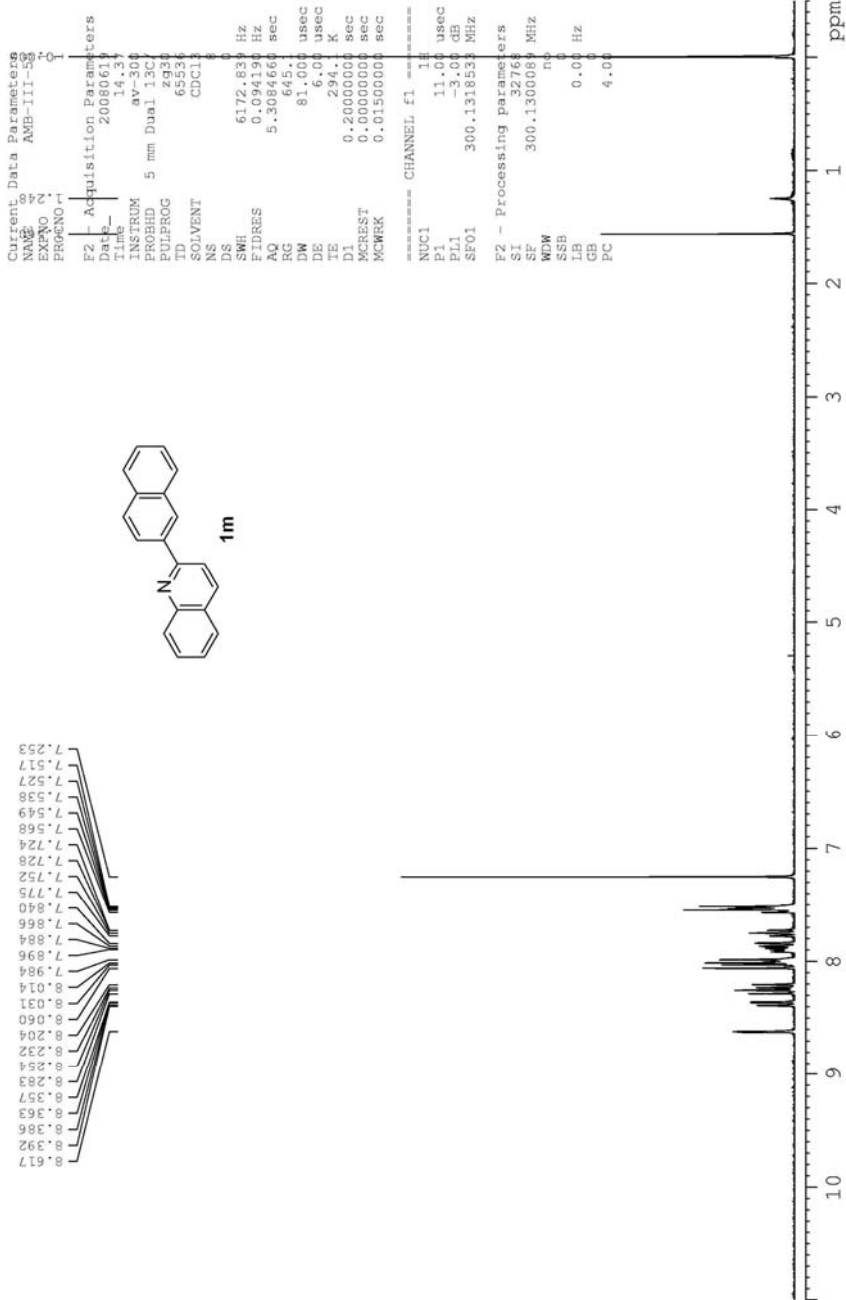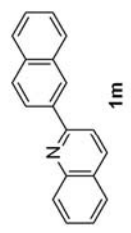

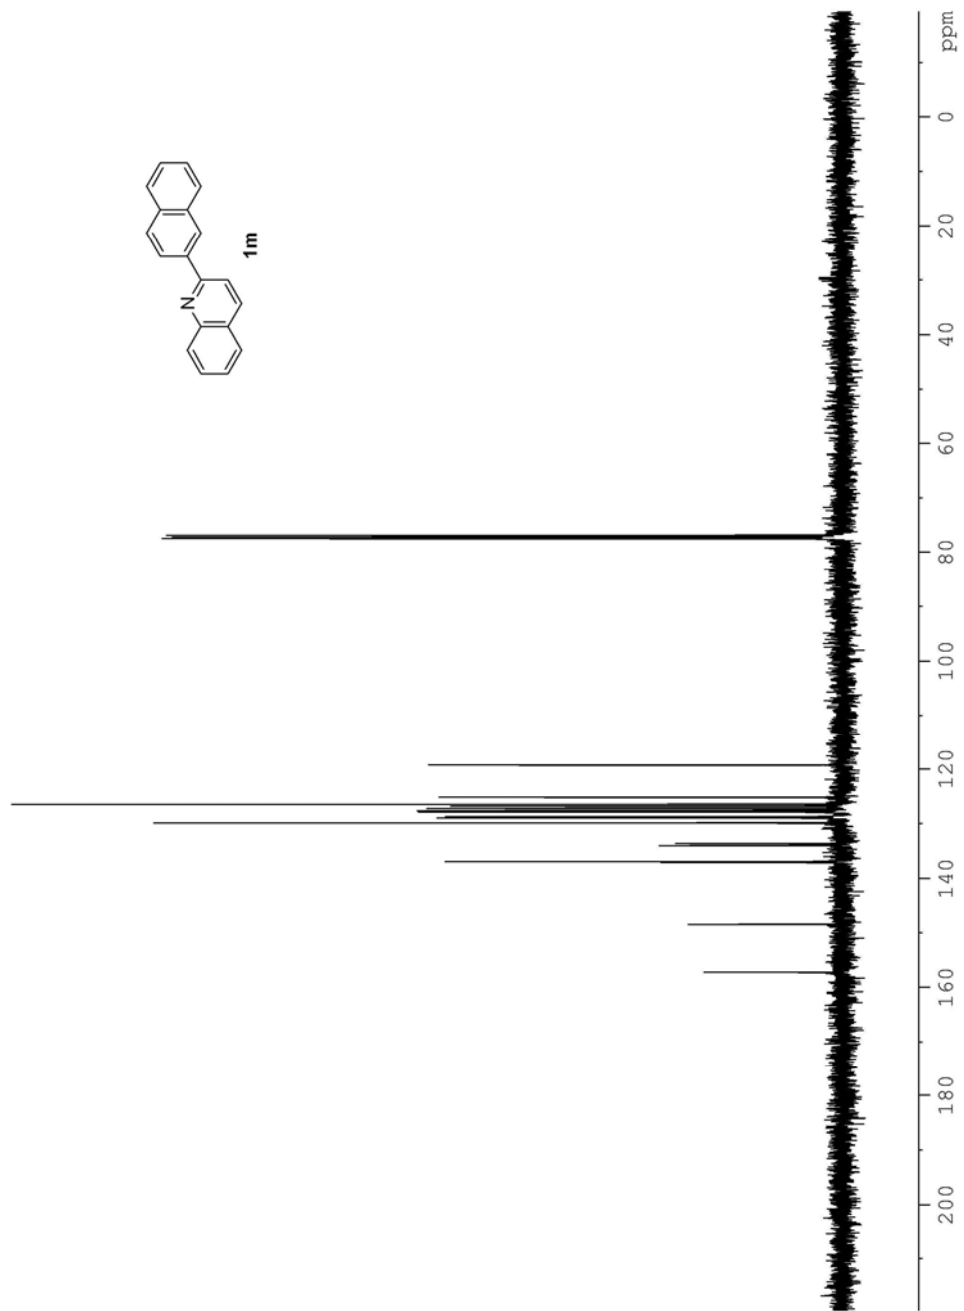

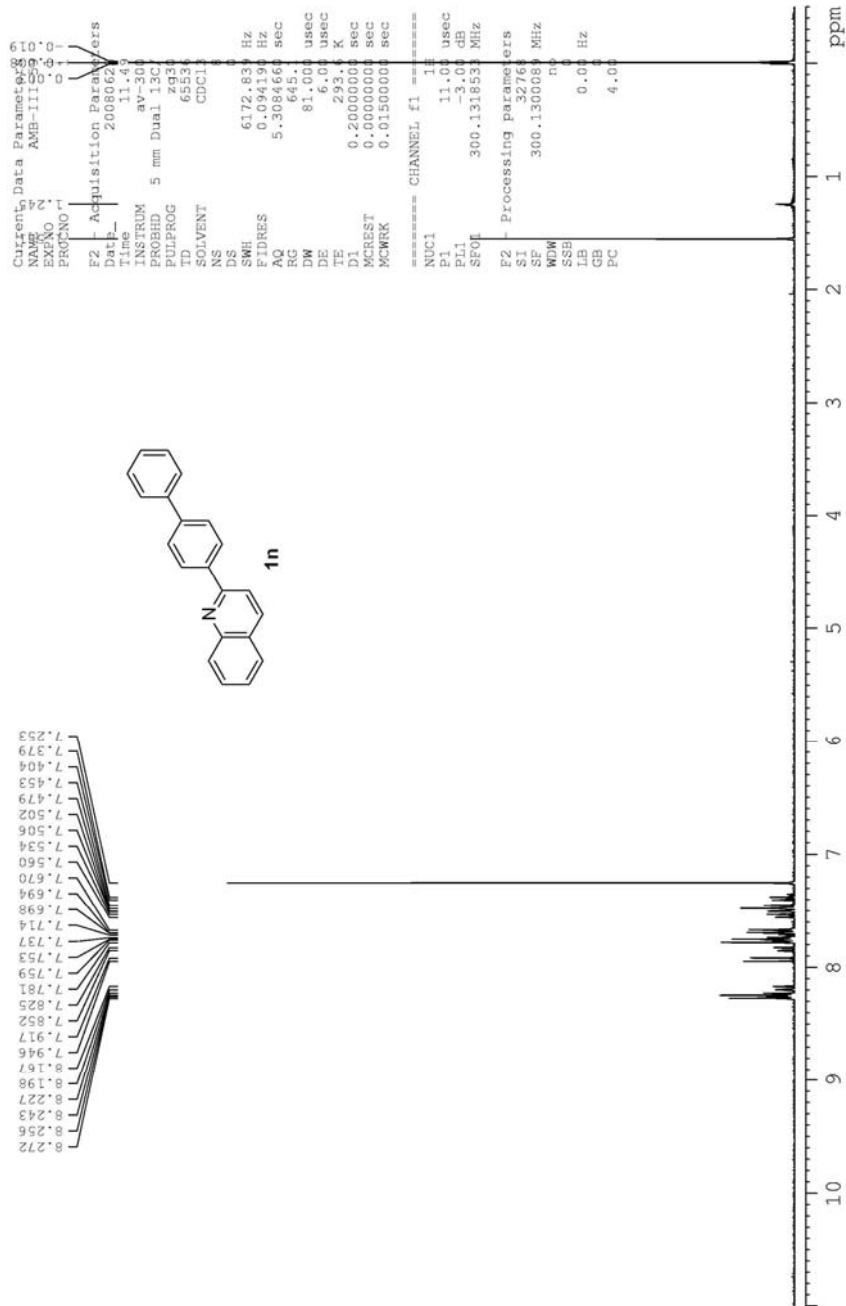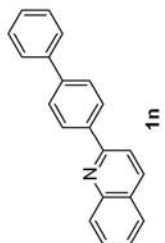

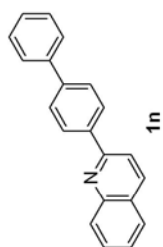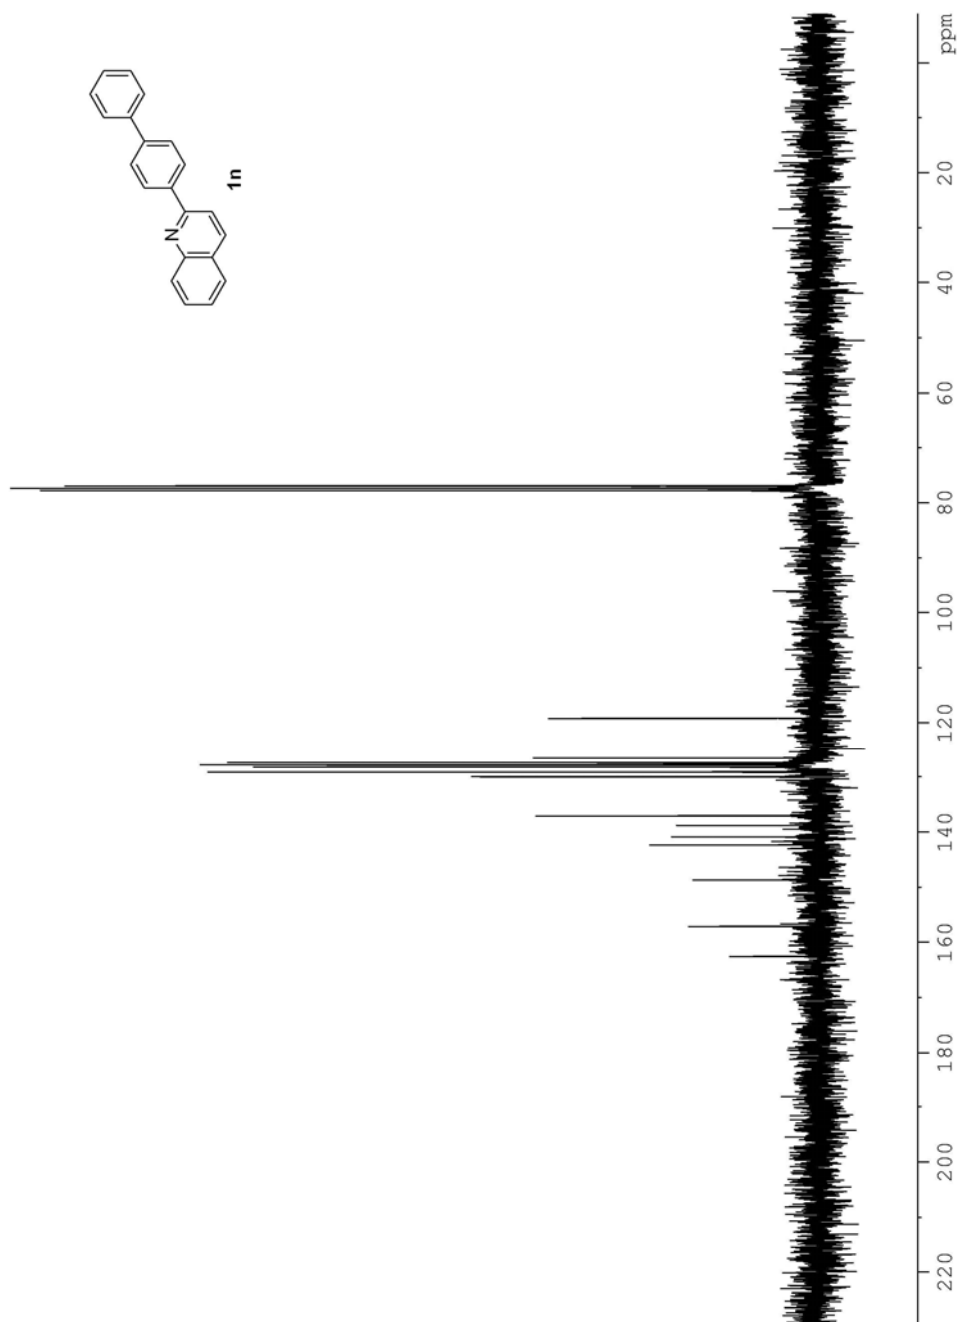

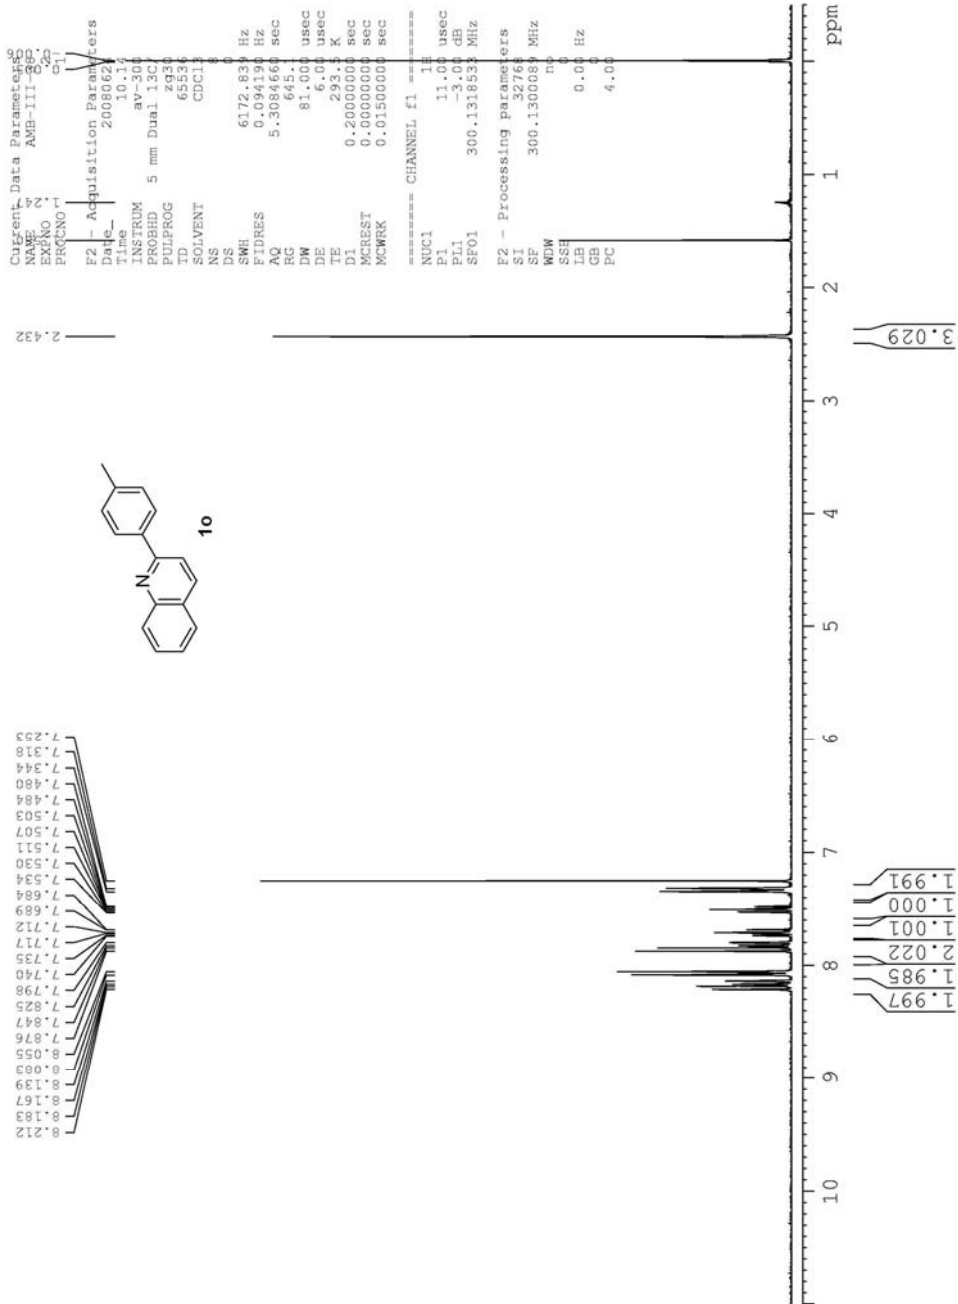

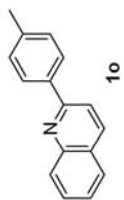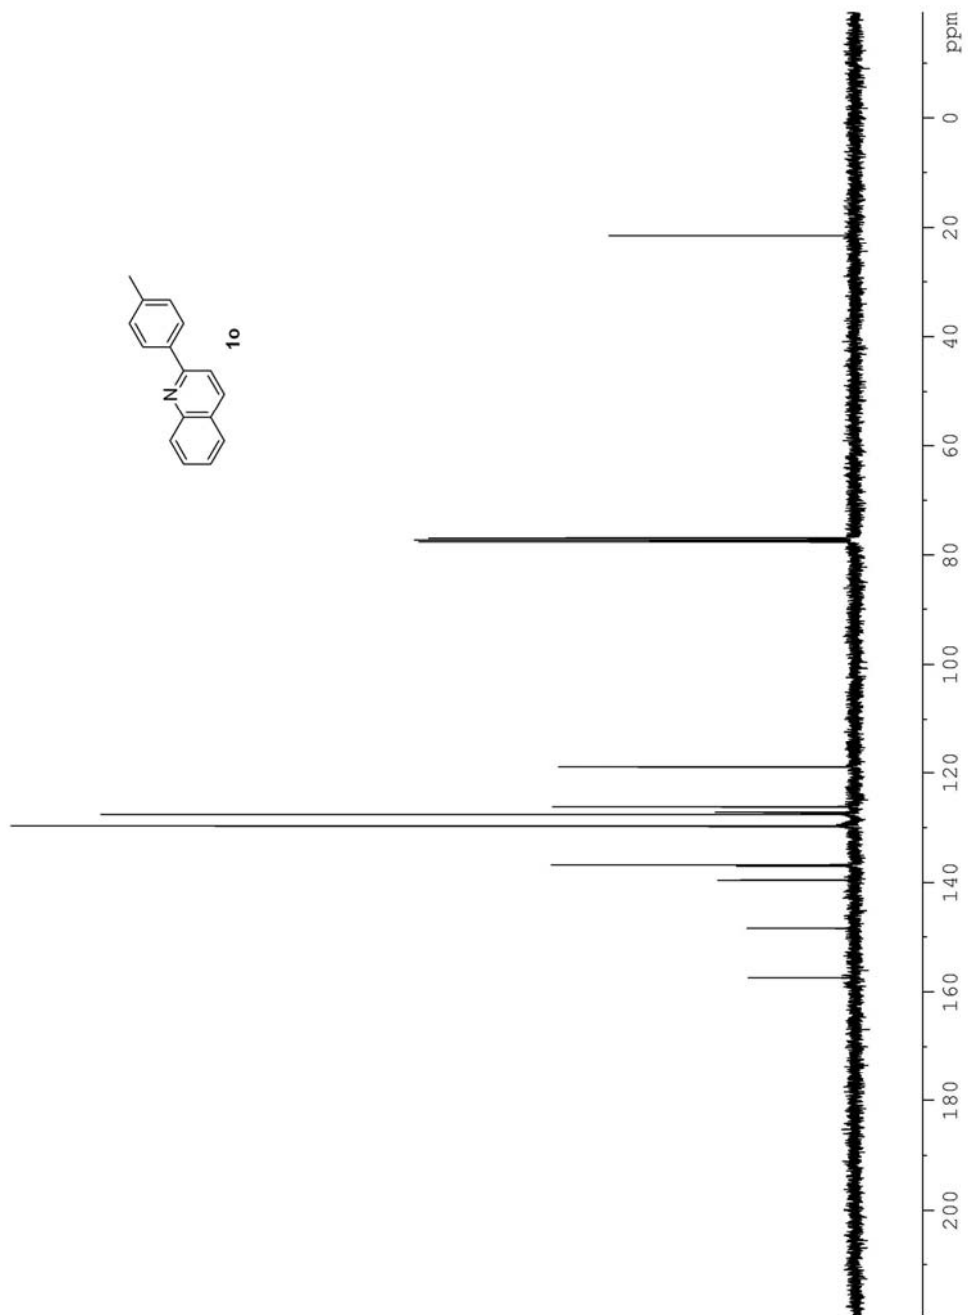

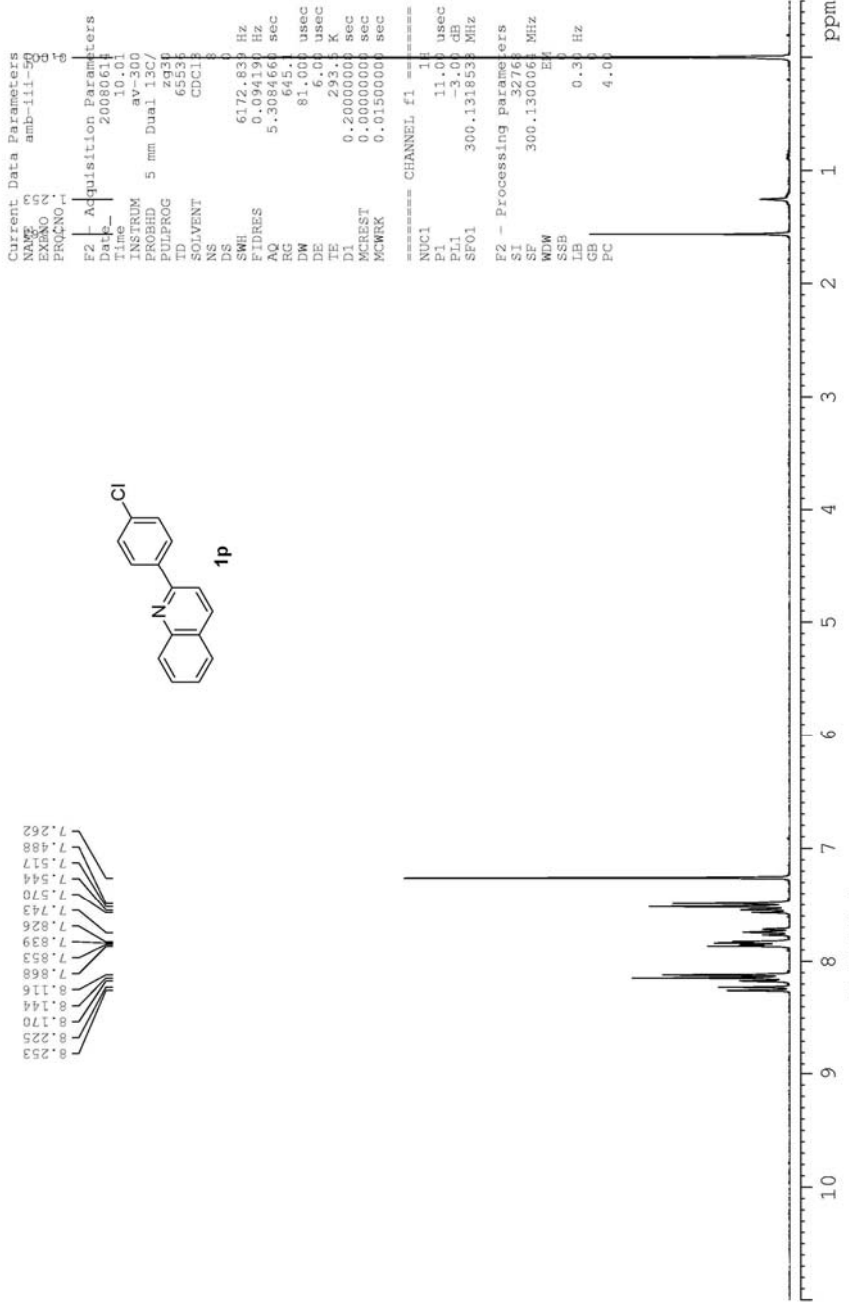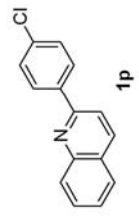



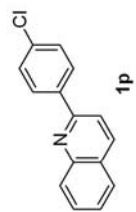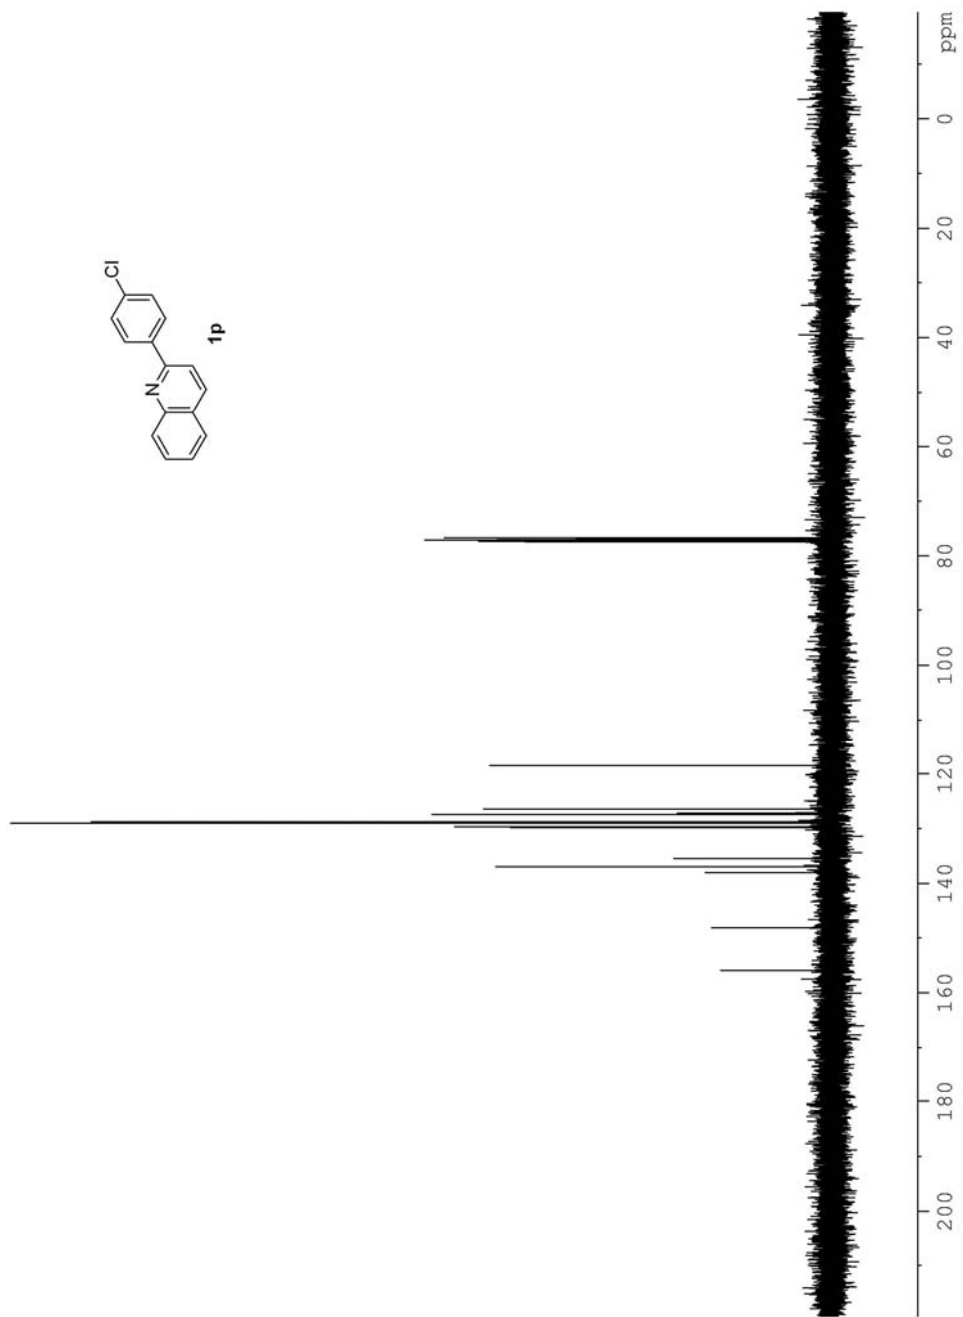

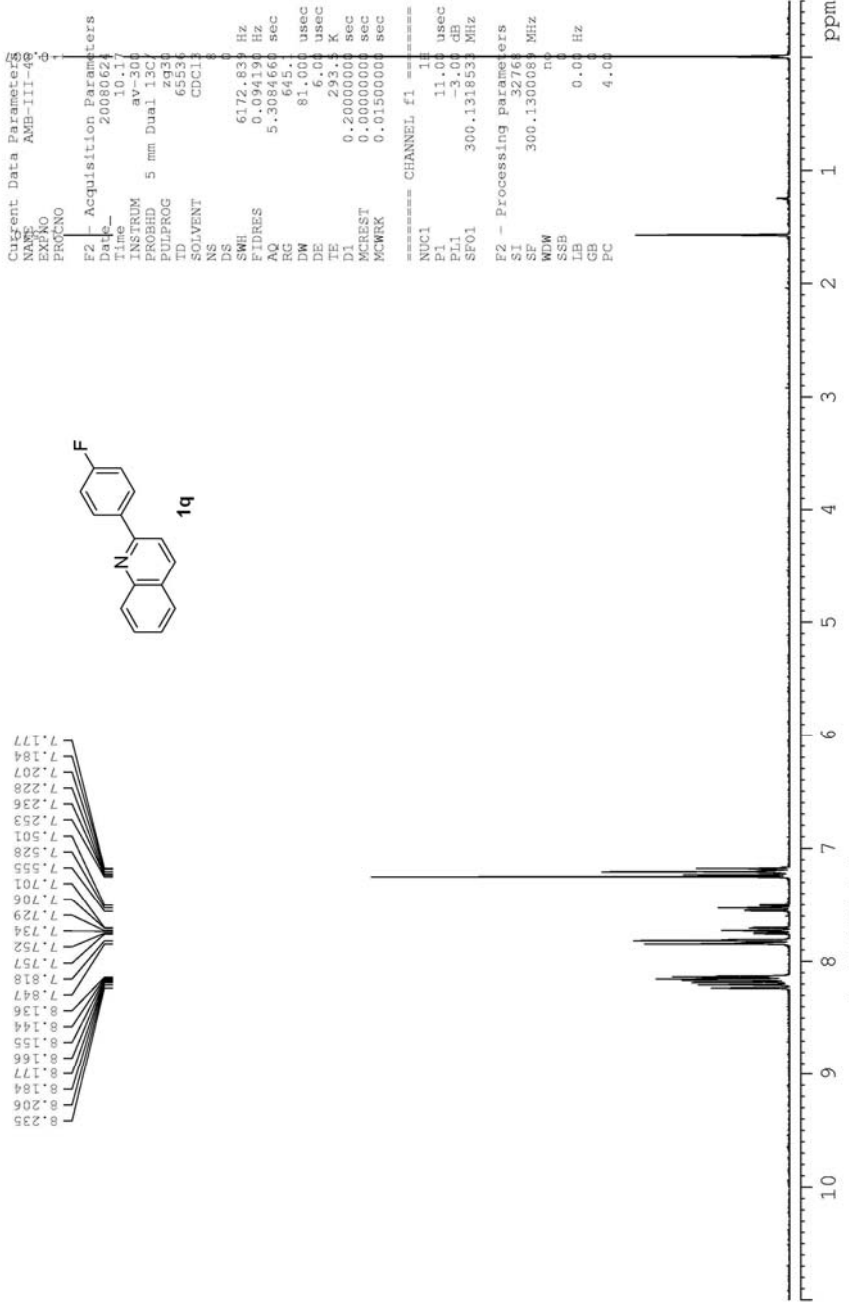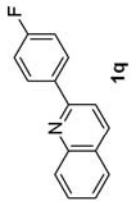

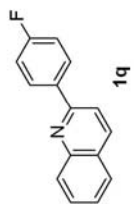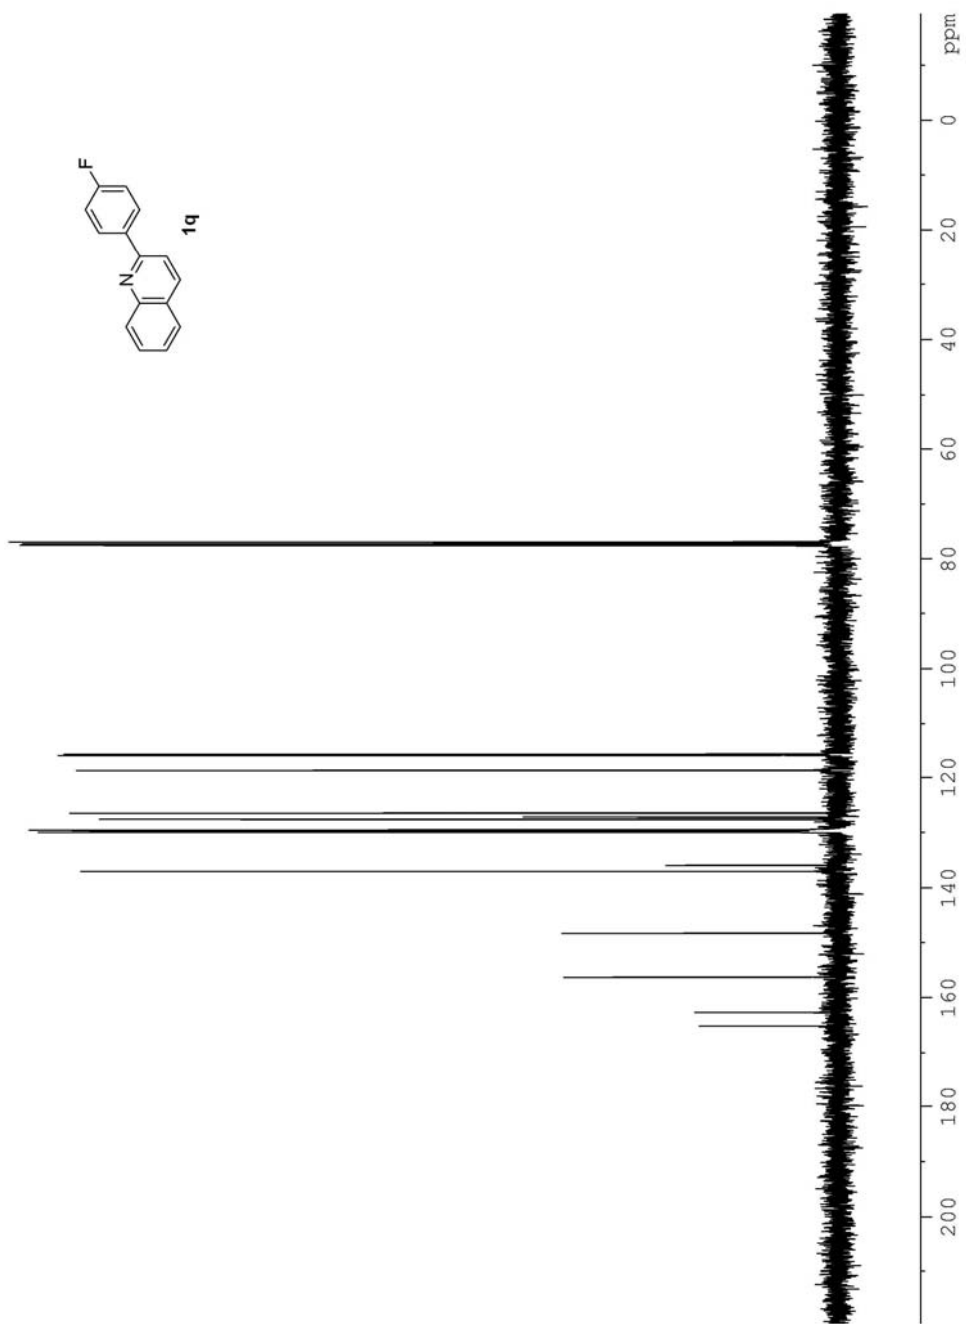

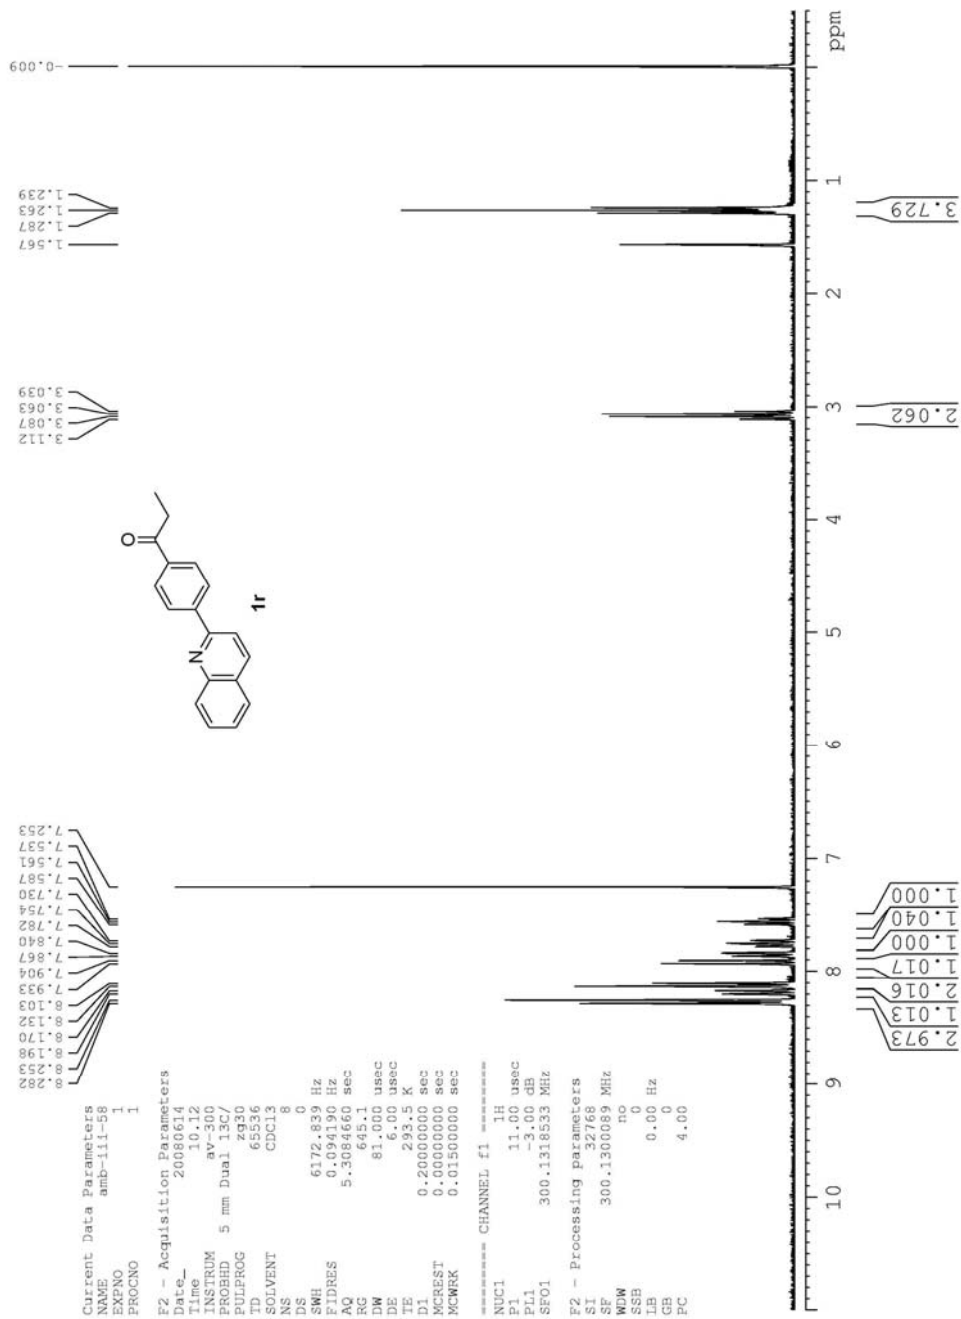

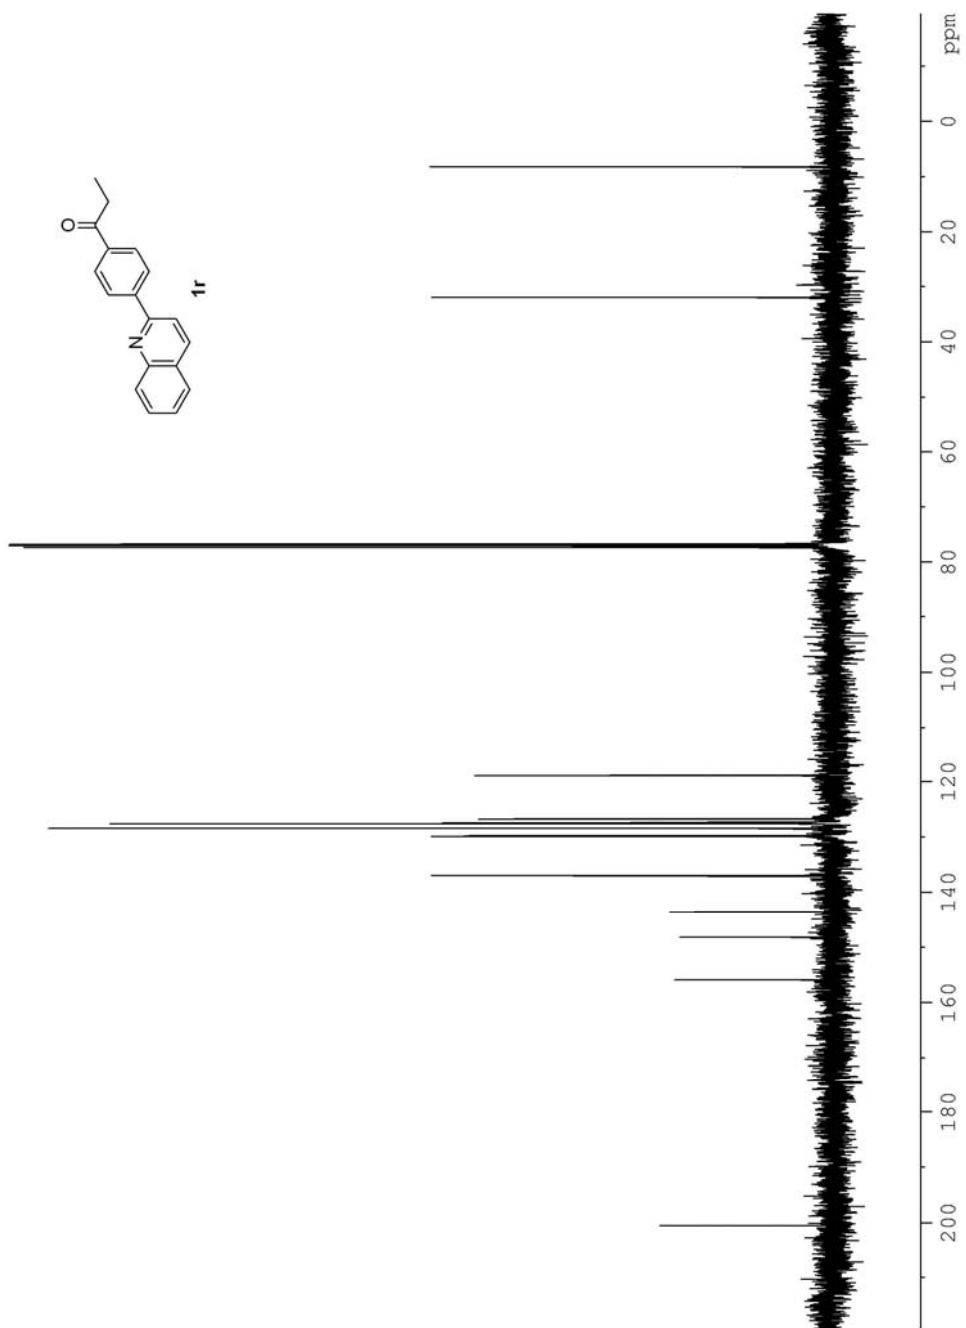

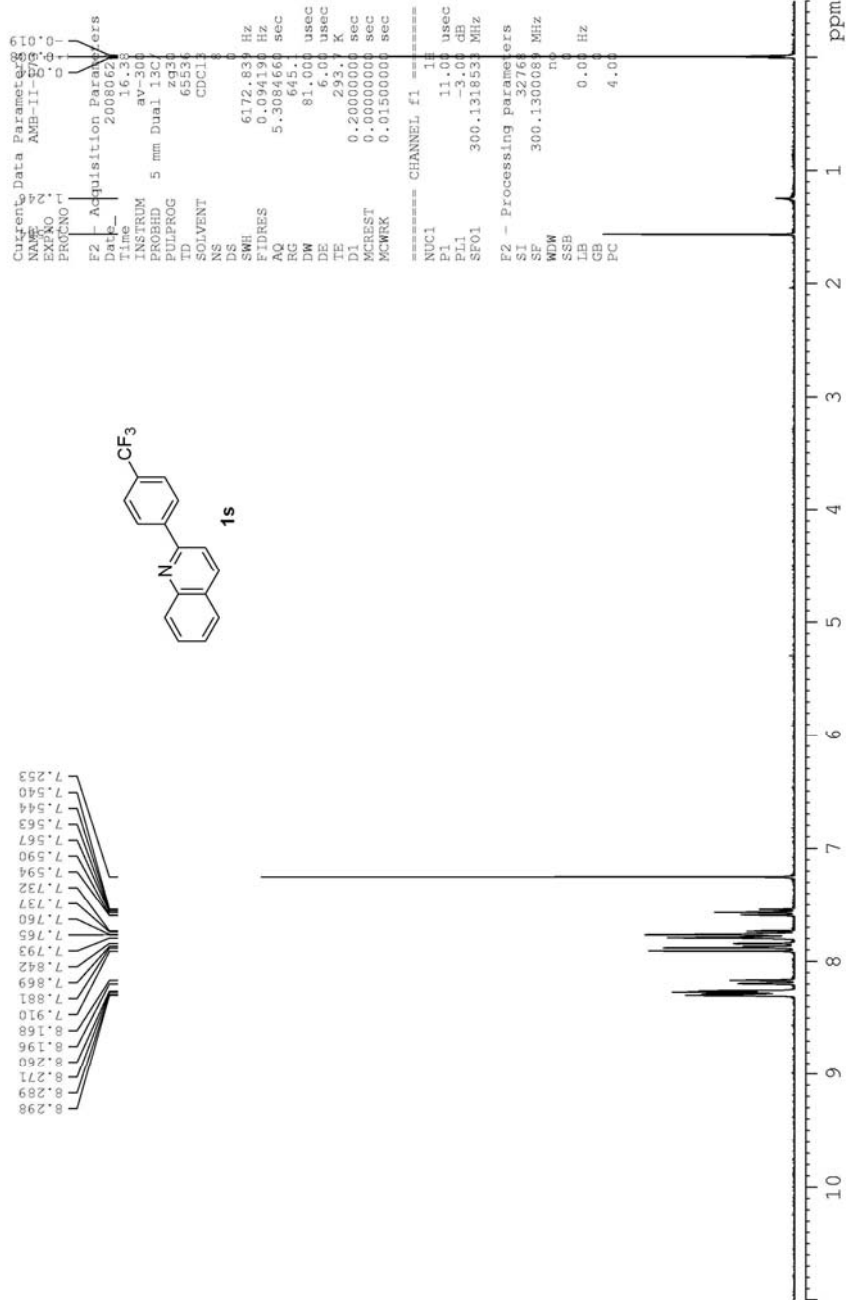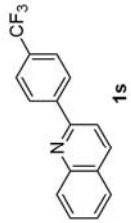

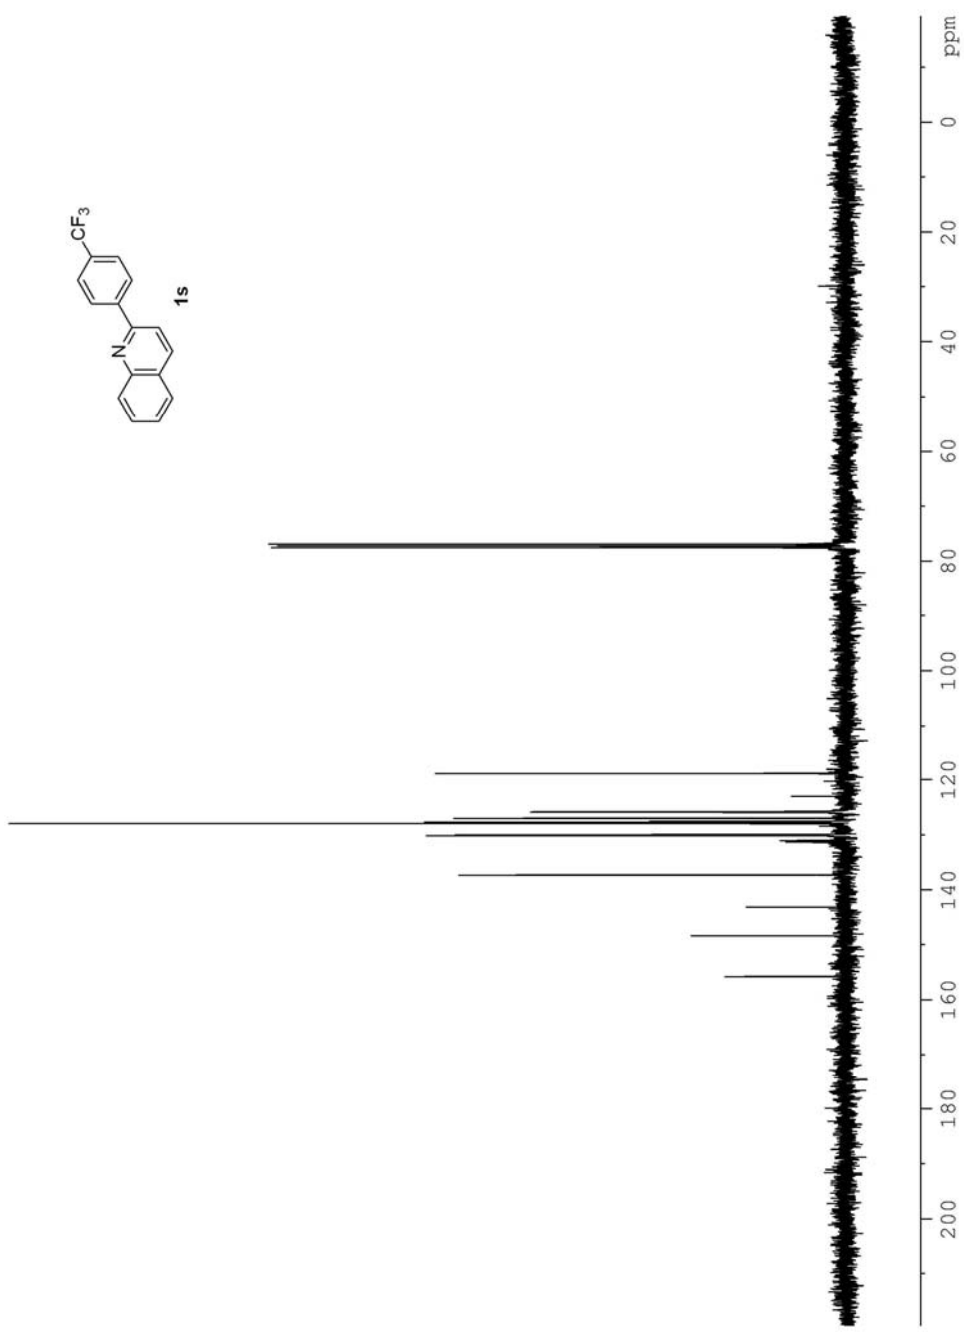

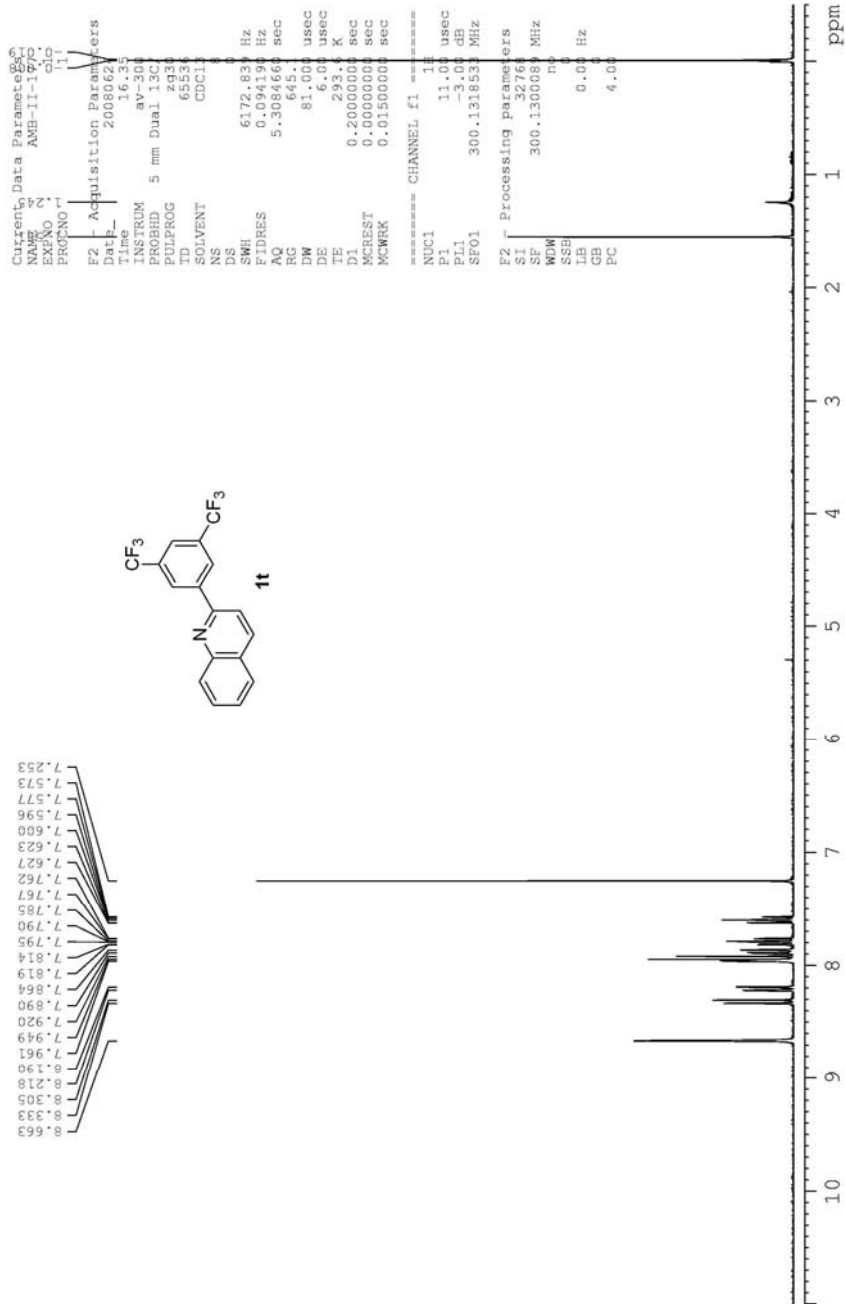



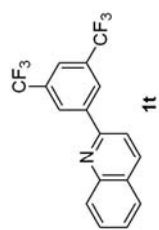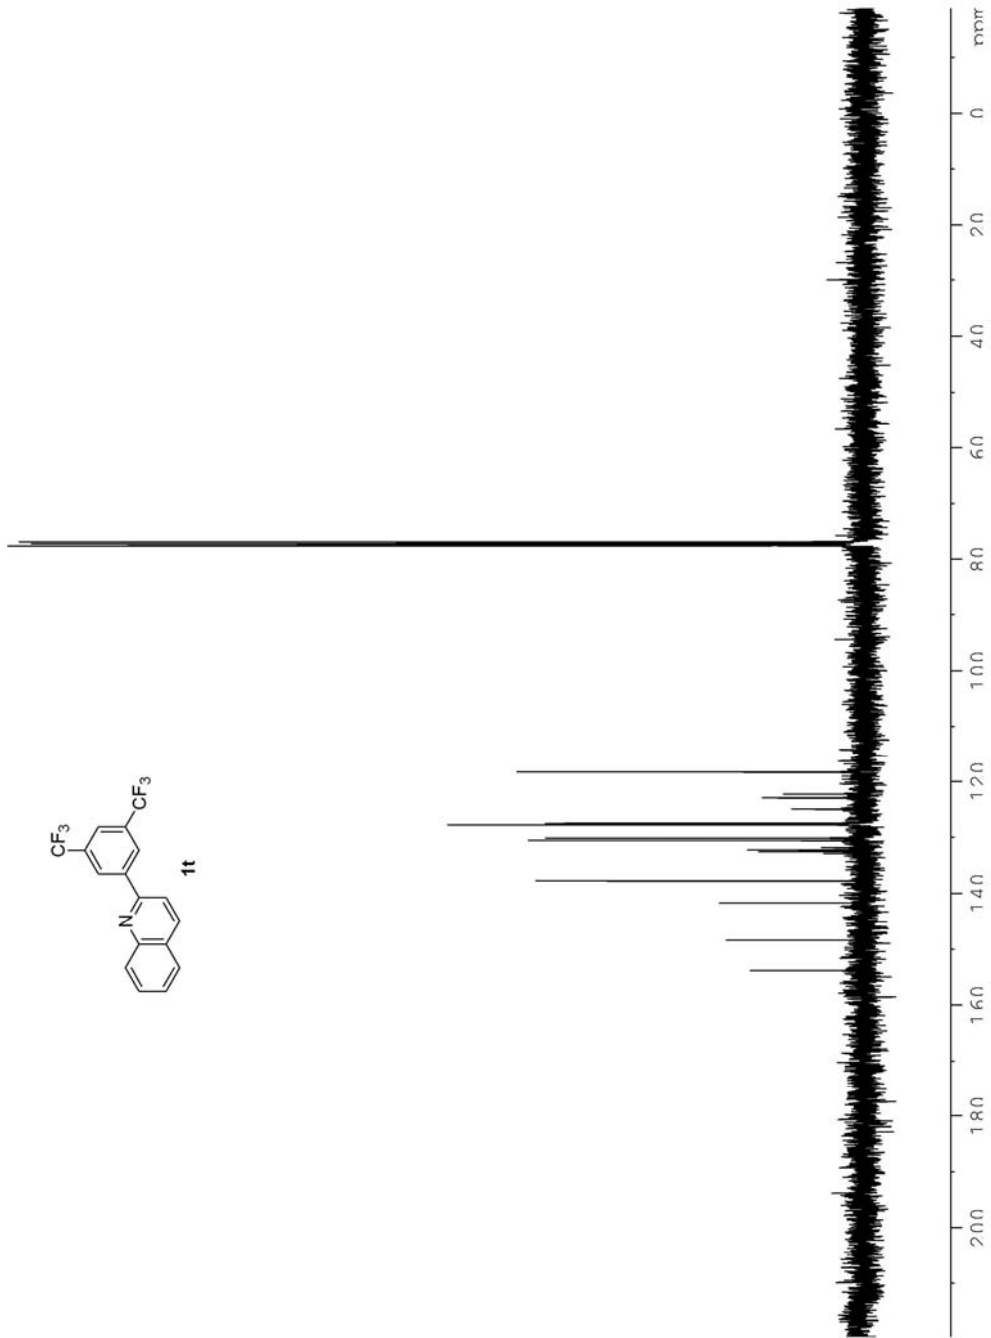

Supplement: NIHMS86401-supplement-1_si_001.pdf [file NIHMS86401-supplement-1_si_001.pdf]
